# Supplementary material for: Two bifunctional inositol pyrophosphate kinases/phosphatases control plant phosphate homeostasis
Source: eLife journal article supplement (doi:10.7554/elife.43582), 2019-08-22
Supplement: supp [file elife-43582-supp-v1.zip]

Archive with 22 entries (22 files):
- elife_poa_e43582_Supplementary_file_2.xlsx
- elife_poa_e43582_Figure_1_figure_supplement_4.pdf
- elife_poa_e43582_Figure_5_figure_supplement_1.pdf
- elife_poa_e43582_Figure_6_figure_supplement_2.pdf
- elife_poa_e43582_Figure_4_figure_supplement_2.pdf
- elife_poa_e43582_Figure_4_figure_supplement_3.pdf
- elife_poa_e43582_Figure_6_figure_supplement_1.pdf
- elife_poa_e43582_Supplementary_file_1.xlsx
- elife_poa_e43582_Figure_1_figure_supplement_1.pdf
- elife_poa_e43582_Figure_4_figure_supplement_1.pdf
- elife_poa_e43582_Figure_1_figure_supplement_2.pdf
- elife_poa_e43582_Figure_5_figure_supplement_2.pdf
- elife_poa_e43582_Figure_2_figure_supplement_1.pdf
- elife_poa_e43582_Figure_2_figure_supplement_4.pdf
- elife_poa_e43582_Figure_1_figure_supplement_3.pdf
- elife_poa_e43582_Figure_1_figure_supplement_5.pdf
- elife_poa_e43582_Figure_5_figure_supplement_3.pdf
- elife_poa_e43582_Figure_3_figure_supplement_1.pdf
- elife_poa_e43582_Figure_2_figure_supplement_3.pdf
- elife_poa_e43582_Supplementary_file_3.xlsx
- elife_poa_e43582_Figure_2_figure_supplement_2.pdf
- elife_poa_e43582_Transparent_Reporting_File.pdf
