# Supplementary material for: Two bifunctional inositol pyrophosphate kinases/phosphatases control plant phosphate homeostasis
Source: eLife journal article supplement (doi:10.7554/elife.43582), 2019-08-22
Supplement: supp [file elife-43582-supp-v1.zip › elife_poa_e43582_Figure_1_figure_supplement_2.pdf]

|        |     | Kinase domain                                                 |                                                               |                    |
|--------|-----|---------------------------------------------------------------|---------------------------------------------------------------|--------------------|
| ScVIP1 | 354 | -                                                             | DGEDHNIYIYYHSKNGGGGRRLFRKVGNKSSSEFDPTLVHPRTEGSYIYEQFMDTDNFEDV | - 413              |
| SpASP1 | 200 | -                                                             | YGEDHNIYIYFPKSVGGGGRKLFRKVANKSSDYDPDLCAPRTEGSFIYEEFMNVDNAEDV  | - 259              |
| HsVIP2 | 162 | -                                                             | SAEDHNVYIYYPTSAGGGSQRLFRKIGSRSSVYSPEs-NVRKTGSYIYEEFMPTDG-TDV  | - 247              |
| AtVIH1 | 159 | -                                                             | NGDDHSIMIIYPSSAGGGMKELFRKVGNRSSEFHPDVRVRREGSYIYEEFMPTGG-TDV   | - 217              |
| AtVIH2 | 160 | -                                                             | NGDDHSIMIIYPSSAGGGMKELFRKIGNRSSEFHPDVRVRREGSYIYEEFMATGG-TDV   | - 218              |
|        |     | .:**.: **: .. *** :.*****:..** : *                            |                                                               | * **:***:** ... ** |
|        |     | Kinase domain                                                 |                                                               |                    |
| ScVIP1 | 414 | -                                                             | KAYTIGENFCHAETRKSPVVDGIVRRNTHGKEVRYITELSDDEEKTIAGKVSKAFSQMICG | - 473              |
| SpASP1 | 260 | -                                                             | KVYTVGPHYSHAETRKSPVVDGIVRRNPHGKEIRFITNLSEEEKNMASKISIAFEQPVCG  | - 319              |
| HsVIP2 | 248 | -                                                             | KVYTVGPDYAHAEARKSPALDGKVERDSEGKEVRYPVILNAREKLIAWKVCLAFKQTVCG  | - 307              |
| AtVIH1 | 218 | -                                                             | KVYTVGPEYAHAEARKSPVVDGVVMRNPDGKEVRYPVLLTPAEKQMAREVCIAFRQAVCG  | - 277              |
| AtVIH2 | 219 | -                                                             | KVYTVGPEYAHAEARKSPVVDGVVMRNTDGKEVRYPVLLTPAEKQMAREVCIAFRQAVCG  | - 278              |
|        |     | *.***:* ..:***:*****:*** * *: .***:*: . *. ** :* ::. ** * :** |                                                               |                    |
|        |     | Kinase domain                                                 |                                                               |                    |
| ScVIP1 | 474 | -                                                             | FDLLRVSGKSYVIDVNGFSFVKDNKAYYDSCANILRSTFIEAKKKMDM-EKKN-----    | - 525              |
| SpASP1 | 320 | -                                                             | FDLLRVSGQSYVIDVNGWSFVKDNNDYDNAARILKQMFHVAERHRRN-RVPSVQ-----   | - 373              |
| HsVIP2 | 308 | -                                                             | FDLLRANGQSYVCDVNGFSFVKNSMKYDDCAKILGNIVMRELAPQFH-----IPWSIP    | - 361              |
| AtVIH1 | 278 | -                                                             | FDLLRSEGSSYVCDVNGWSFVKNSYKYDDAACVLRKMFLDAKAPHLSSSTIPPILPWKIN  | - 337              |
| AtVIH2 | 279 | -                                                             | FDLLRSEGCSYVCDVNGWSFVKNSYKYDDAACVLRKMCLDAKAPHLSSSTLPPTLPWKVN  | - 338              |
|        |     | *****.* *** *****:*****:. ***..* :* .                         |                                                               |                    |
|        |     | phosphatase domain                                            |                                                               |                    |
| ScVIP1 | 526 | -                                                             | -----LPIIREEKEQKWVFKGLAIIIRHADRTPKQKFKHSFTSPIFISLLKGH         | - 573              |
| SpASP1 | 374 | -                                                             | -----EVLNPPPRESEAWRLKSLVGVLRHADRTPKQKFKFSFTSDPFVKLLQGH        | - 422              |
| HsVIP2 | 362 | -                                                             | LEAEDI-----PIVPTTSGTMELRCVIAVIRHGDRTPKQKMKMEVRHQKFFDLFEKC     | - 414              |
| AtVIH1 | 338 | -                                                             | EPVQSNEGLTRQSGGIIGTFGQSEELRCVIAIVRHGDRTPKQKVKLKVTEEKLLNLMLKY  | - 397              |
| AtVIH2 | 339 | -                                                             | EPVQSNEGLTRQSGGIIGTFGQSEELRCVIAVVRHGDRTPKQKVKLKVTEEKLLNLMLKY  | - 398              |
|        |     | :: : ::**.******.* .. :..*:                                   |                                                               |                    |
