# Supplementary material for: Two bifunctional inositol pyrophosphate kinases/phosphatases control plant phosphate homeostasis
Source: eLife journal article supplement (doi:10.7554/elife.43582), 2019-08-22
Supplement: supp [file elife-43582-supp-v1.zip › elife_poa_e43582_Figure_2_figure_supplement_1.pdf]

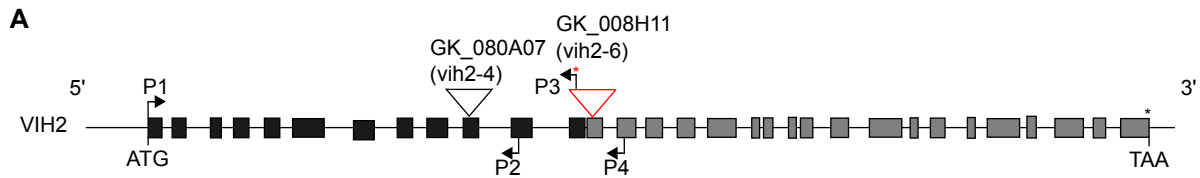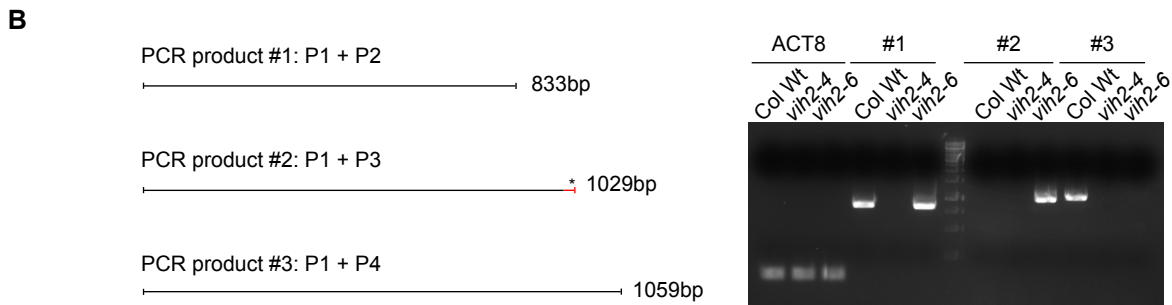

**C**

DNA sequence of truncated VIH2 transcript:

```

ATGGAGATGGAAGAAGGAGCAAGTGGTGTGGTGAGAAGATAAAGATTGGAGTCTGCGTCATGGAAAAGAAGGTTTTTC
TCAGCTCCCATGGGGGAAATTCGACAGACTCCAGTCTTTTGGTGAATTTGAGATCTTACATTTTGGGGATAAAGTTAT
ACTTGAAGATCCAATAGAAAGTTGGCCATTTGTGATTGCTTGTATTGCTTTTCATTCTCTGGATATCCTCTTGAGAAGGC
TCAGGCATATGCTGCTTTAAGAAAGCCATTTTAGTGAATGAAGTGGATCCGCAATATCTTCTTCATGATCGCCGGAAGGT
GTATGAGCATCTTGAGATGTATGGCATCCAGTTCCTAGGTATGCTTGTGTCAATAGAAAGGTACCAAATCAAGACCTTCA
TTATTTTGTGCGAGGAAGAAGATTTTGTGAGGTCCATGGTGAACGCTTCTGGAAGCCATTTGTGAAAAGCCTGTCAAT
GGAGATGACCATAGTATAATGATATACTACCTAGCTCGGCAGGTGGAGGCATGAAAGAATTGTTTCGCAAGATTGGGAA
CCGATCAAGTGAATTTTCATCCTGACGTCAGAAAGGTAAGGAGAGAAGGCTCTTATATATACGAGGAGTTTATGGCCACC
GGAGGAAGTGAATGCAAGGTCTATACAGTGGGTCTGAATACGCACATGCTGAAGCAAGAAAGTCACCTGTTGTTGATG
GTGTTGTTATGAGGAATACAGATGGGAAGGAAGTGAGATATCCAGTATTGCTTACACCTGCTGAAAAGCAAATGGCTAGA
GAAGTTTGCATTGCATTTAGGCAAGCGGTCTGTGGGTTTGATCTTCTACGATCTGAGGGCTGTTTCATATGTTTGTGATGT
CAATGGATGGAGTTTTGTGAAGAACTCATAAAGTATTATGACGATGCTGCGTGTGTGCTAAGGAAAATGTGTTTGGATG
CAAAAGCTCCTCATCTCTCATCCTCAAACACTGATAGTTTAAACCGAAGGCGGGAACGACAATCTGA

```

**D**

Sequence of truncated VIH2 protein:

```

MEMEEGASGVGEKIKIGVCVMEKKVFSAPMGEILDRLQSFGEFEILHFGDKVILEDPYESWPICDCLIAFHSSGYPLEK
AQAYAALRKPFVLNQLDPQYLLHRRKVEYEHLEMYGIPVPRYACVNRKVPNQDLHYFVEEEDFVEVHGERFWKPFV
EKPVNGDDHSIMIIYPSSAGGGMKELFRKIGNRSSEFHPDVRVRREGSYIYEEFMATGGTDVKVYTVGPYAHAEA
RKSPVVDGVVMRNTDGKEVRYPVLLTPAEKQMAREVCIAFRQAVCGFDLLRSEGSYVCDVNGWSFVKNSYKYD
DAACVLRKMCLDAKAPHLSSSNTDSLNRRETTI*

```
