# Supplementary material for: Two bifunctional inositol pyrophosphate kinases/phosphatases control plant phosphate homeostasis
Source: eLife journal article supplement (doi:10.7554/elife.43582), 2019-08-22
Supplement: supp [file elife-43582-supp-v1.zip › elife_poa_e43582_Supplementary_file_1.xlsx]

## Sheet: a
	vih1-2♀	vih1-4♀	vih1-6♀	vih1-2♂	vih1-4♂	vih1-6♂
vih2-4	DL	WL	DL	DL	WL	DL
vih2-6	WL	WL	WL	WL	WL	WL

## Sheet: b
	VIH1 (+/-); VIH2 (-/-)		VIH1 (-/-); VIH2 (+/-)
	DL plants, %	WL plants, %	DL plants, %	WL plants, %
#1	18.6	81.4	22.2	77.8
#2	22.7	77.3	21.3	78.7
#3	21.7	78.3	17.1	82.9
#4	15	85	20.8	79.2
#5	29.1	70.9	17.7	72.3
#6	17.3	82.7	22.4	77.6

## Sheet: c
Promoter	Gene	Tag	Resistance	Genetic background
pVIH1	VIH1	mCitrine	Basta	vih1-2
pVIH2	VIH2	mCitrine	Basta	vih2-4
pVIH1	VIH1	mCitrine	Basta	vih1-2 vih2-4
pVIH2	VIH2	mCitrine	Basta	vih1-2 vih2-4
pVIH2	VIH2KD	mCitrine	Hygromycin	vih1-2 vih2-4
pVIH2	VIH2PD	mCitrine	Hygromycin	vih1-2 vih2-4
pVIH1	GUS		Basta	Col Wt
pVIH2	GUS		Basta	Col Wt
35S	VIH1amiRNA		Hygromycin	vih2-4
pVIH2	H2B	mCitrine	Basta	Col Wt
pVIH2	H2B	mCitrine	Basta	vih2-4
pSPX1	H2B	eGFP	Hygromycin	spx1-1
pSPX3	H2B	eGFP	Hygromycin	Col Wt
pSPX1	SPX1	eGFP	Hygromycin	spx1-1
pSPX3	SPX3	eGFP	Hygromycin	Col Wt
pUbi10	VIH1	mCitrine	Hygromycin	Col Wt
pUbi10	VIH1KD	mCitrine	Hygromycin	Col Wt
pUbi10	VIH1PD	mCitrine	Hygromycin	Col Wt
pUbi10	VIH2	mCitrine	Hygromycin	Col Wt
pUbi10	VIH2KD	mCitrine	Hygromycin	Col Wt
pUbi10	VIH2PD	mCitrine	Hygromycin	Col Wt
pVIH2	HsVIP2	mCitrine	Hygromycin	VIH1(+/-) VIH2(-/-)
pVIH2	HsVIP2KD	mCitrine	Hygromycin	VIH1(+/-) VIH2(-/-)
pVIH2	HsVIP2PD	mCitrine	Hygromycin	vih1-2 vih2-4
