# Supplementary material for: Two bifunctional inositol pyrophosphate kinases/phosphatases control plant phosphate homeostasis
Source: eLife journal article supplement (doi:10.7554/elife.43582), 2019-08-22
Supplement: supp [file elife-43582-supp-v1.zip › elife_poa_e43582_Supplementary_file_2.xlsx]

## Sheet: a
Primer name	Primer sequence
vih1-2_LP	AGAAAGATGAGGAGCCTTTGC
vih1-2_RP	TTTTTCCATGAACAATGGAGC
vih1-4 LP	TCGTCGCCGATTTTGTTATAG
vih1-4 RP	GTTCGTCAGAGCAAGAAAACG
vih1-6 LP	GTGATTAGAAATGCACAGGCC
vih1-6 RP	GATCCTATCTTAGTTGCGGCC
Vih2-4_LP	GCATGAGTTGCTTATGTTTTC
Vih2-4_RP	CACGAAATCAGAACGTACCA
Vih2-6_LP	GCAGTCAGAAGAGCTACGTTG
Vih2-6_RP	GGGAACTAACATTCTTGTGGC
Spx1-1_LP	AGAGATAGAATTGCGAAAGC
Spx1-1_RP	CTATTTGGCTTCTTGCTCC
Spx2-1_LP	CACCATCAATCCTGTAACCAA
Spx2-1_RP	TGGCCGGAGTCATTCGTCAT
35St	GTGGATTGATGTGATATCTCC
LBo8409	ATATTGACCATCATACTCATTGC
LBb1.3	ATTTTGCCGATTTCGGAAC
p745	AACGTCCGCAATGTGTTATTAAGTTGTC

## Sheet: b
Primer name	Sequence
VIH1prom-B4F	GGGGACAACTTTGTATAGAAAAGTTGCTCCAAGAGAGACATAATTT
VIH1prom-B1R	GGGGACTGCTTTTTTGTACAAACTTGCTTTCGCTCTCTCCTCCCG
VIH2prom-B4F	GGGGACAACTTTGTATAGAAAAGTTGCTTACTACTACTATATACACTACAC
VIH2prom-B1R	GGGGACTGCTTTTTTGTACAAACTTGCTCTCTCGGCCTTTCTCGC
VIH1cDNA-B1F	GGGGACAAGTTTGTACAAAAAAGCAGGCTTAATGGGGGTGGAAGAAGGAGCT
VIH1cDNA-B2R	GGGGACCACTTTGTACAAGAAAGCTGGGTAGCTTTTGCCATTAGAGGTGTTC
VIH2cDNA-B1F	GGGGACAAGTTTGTACAAAAAAGCAGGCTTAATGGAGATGGAAGAAGGAATG
VIH2cDNA-B2R	GGGGACCACTTTGTACAAGAAAGCTGGGTAGCTCCTTCCATTAGAAGAAGAG
VIH1_K218A_F	GATGTCGCGGTCTACACTGTGGGTCCCGAATATGCACAC
VIH1_K218A_R	GTGTAGACCGCGACATCAGTTCCCCCAGTAGGCATAAACTCC
VIH1_D291A_F	GTTTGTGCCGTAAATGGATGGAGTTTTGTGAAGAACTCCTATAAG
VIH1_D291A_R	CCATTTACGGCACAAACATATGAACTTCCCTCAGATCGTAGGAG
VIH2_K219A_F	GATGTCGCGGTCTATACAGTGGGTCCTGAATACGCACATG
VIH2_K219A_R	GTATAGACCGCGACATCAGTTCCTCCGGTGGCCATAAAC
VIH2_D298A_F	GTTTGTGCTGTCAATGGATGGAGTTTTGTGAAGAACTCATACAAG
VIH2_D298A_R	CCATTGACAGCACAAACATATGAACAGCCCTCAGATCGTAG
VIH1_R371A-H372A_F	ATTGTTGCGGCTGGTGATAGAACCCCCAAGCAGAAAGTG
VIH1_R371A-H372A_R	ATCACCAGCCGCAACAATAGCAATGACACAGCGTAGCTCC
VIH2-R372A-H373A-F	GTTGTTGCAGCTGGCGATAGAACTCCCAAGCAGAAAGTGAAAC
VIH2-R373A-H373A-R	ATCGCCAGCTGCAACAACAGCAATGACACAACGTAGCTCTTC
VIH1amiRNA_miR-s2	GATTTGACTATATCTATCCTCGTTCTCTCTTTTGTATTCC
VIH1amiRNA_miR-a2	GAACGAGGATAGATATAGTCAAATCAAAGAGAATCAATGA
VIH1amiRNA_miR*s2	GAACAAGGATAGATAAAGTCAATTCACAGGTCGTGATATG
VIH1amiRNA_miR*a2	GAATTGACTTTATCTATCCTTGTTCTACATATATATTCCT
HsVIP2cDNA-B1F	GGGGACAAGTTTGTACAAAAAAGCAGGCTTAATGTCTGAGGCTCCTAGATTC
HsVIP2cDNA-B2R-NS	GGGGACCACTTTGTACAAGAAAGCTGGGTACTTCTTCTTCCCGGTATTCTTC
HsVIP2_D321A_F	GTGTGTGCTGTGAACGGGTTCAGCTTCGTGAAGAACAG
HsVIP2_D321A_R	CGTTCACAGCACACAC GTAGGACTGTCCGTTAGCTCTG
HsVIP2_R388A_F	GTGATCGCACACGGTGATAGAACCCCGAAGCAAAAGATG
HsVIP2_R388A_R	CACCGTGTGCGATCAC AGCGATCACGCATCTGAGTTC
SPX1pro-B4F	GGGGACAACTTTGTATAGAAAAGTTGCTTAGTGATTGGGTCTCTGAACT
SPX1pro-B1R	GGGGACTGCTTTTTTGTACAAACTTGCAGCTCTTTTATTTTCTGGGAA
SPX1c-B1F	GGGGACAAGTTTGTACAAAAAAGCAGGCTTAATGAAGTTTGGTAAGAGTCTC
SPX1c-B2R-NS	GGGG ACC ACT TTG TAC AAG AAA GCT GGG TAT TTG GCT TCT TGC TCC AAC AA
SPX3pro-B4F	GGGGACAACTTTGTATAGAAAAGTTGCTGTGATTCGGGTTGTCAAAATT
SPX3pro-B1R	GGGGACTGCTTTTTTGTACAAACTTGCCAAAATATAAACTCAAGTTTT
SPX3c-B1F	GGGGACAAGTTTGTACAAAAAAGCAGGCTTAATGAAGTTTGGAAAGAGGATT
SPX3c-B2R-NS	GGGGACCACTTTGTACAAGAAAGCTGGGTATGGAATAGGAATCGGAGAAGA

## Sheet: c
Primer name	Sequence
VIH2-syn-fw	GCGCCCATGGAGATGGAAGAAGGAGCAAG
VIH2-syn-re	GCGCCTCGAGTGCGGCCGCTTAGCTCCTTCCATTAG
VIH2_G11-G955_F	GCGCCCATGGGTGAGAAGATAAAGATTGGAG
VIH2_G11-G955_R	GCGCGCGGCCGCTTATCCACGGCTAAATG
VIH2_G11-R1002_R	GCGCGCGGCCGCTTAACGAACCATTTTCTC
VIH2_G11-A322_R	GCGCGCGGCCGCTTAAGCTTTTGCATCC
VIH2_A322-G955_F	GCGCCCATGGCTCCTCATCTCTCATC
VIH2_G359-G955_F	GCGCCCATGGGGCAGTCAGAAGAGCTAC
VIH2_G500-G955_F	GCGCCCATGGGCGGTGTTTTAACACAC
VIH2_G6_F	GCGCCCATGGGAGCAAGTGGTGTTGG
VIH2_G356_R	GCGCGCGGCCGCTTAGCCGATGATGCCACTTC
AtVIH1-G8-CO-F	GCGCCCATGGGCGTCGACAAGAAAATCACC
AtVIH1_G358_CO-F	GCGCCCATGGGCCAGTCTGAGGAACTGAG
AtVIH1_G355_CO-R	GCGCGCGGCCGCTTAGCCGATGATACCGGAACC
AtVIH1-T1016-CO-R	GCGCGCGGCCGCTTAAGTACAAGGAGGAGGGAAGTC
ScVIP1-G188-CO-F	GCGCCCATGGGCAAGATCGGTGTCTGCGC
ScVIP1-A515-CO-F	GCGCCCATGGCCAAGAAAAAGATGGACATG
ScVIP1-A515-CO-R	GCGCGCGGCCGCTTAGGCCTCGATGAAGGTGGAAC
ScVIP1-R1088-CO-R	GCGCGCGGCCGCTTAACGCAGCTTCTGCTGCACGTAG
HsVIP2-syn-fw	GCGCCCATGGCTGAGGCTCCTAGATTCTTCG
HsVIP2-syn-re	GCGCCTCGAGTGCGGCCGCTTATCACTTCTTCTTCCCGGTATTC
HsVIP2_41E-F	GCGCCCATGGAGAGACAGATCGTTGTGGGG
HsVIP2_366D-R	GCGCGCGGCCGCTTAGTCCTCAGCCTCAAGAGG

## Sheet: d
Primer name	Primer sequence
VIH1-a-F	CACCTGCTGAGAAACAAATGGCG
VIH1-a-R	CTTCCCTCAGATCGTAGGAGATC
VIH2-b-F	CAGATGGGAAGGAAGTGAGATATC
VIH2-b-R	CCACAGACCGCTTGCCTAA
VIH2-c-F	CACTCTTCCTCCCACCTTGCC
VIH2-c-R	GCCACTTCCCTGGCGAGTTAG
vih2-6_TDNA_R	GAT TGT CGT TTC CCG CCT TCG G
VIH2cDNA_F	ATGGAGATGGAAGAAGGAGCAAG
ACT2-F	AGTGGTCGTACAACCGGTATTGT
ACT2-R	GATGGCATGGAGGAAGAGAGAAAC
ACT8-F	GACTCAGATCATGTTTGAGACCTTT
ACT8-R	CCAGAGTCCAACACAATACCG
IPS1-F	GCGTTTTAAGATATGGAGCAATG
IPS1-R	CGA AGCTTGCCAAAGGATAG
SPX3-F	CGCCGGTGGAATCTATTTTCG
SPX3-R	CAGAACCATTTCGCCATGGAA
MGD3-F	GGTACGATTGCGGAAGCACTG
MGD3-R	GTCGAACACGGCTTCAGGTTG
SPX1-2-F	CGATCGTCCCGTTAAACGACTCCG
SPX1-2-R	CAAGGCAGCGATTGTGCTCTTC
SPX2-1-F	TCGGCAAGAGCCTAAGCAACC
SPX2-1-R	GACGATTCTCGACGCTTCGTG
