# Supplementary material for: Two bifunctional inositol pyrophosphate kinases/phosphatases control plant phosphate homeostasis
Source: eLife journal article supplement (doi:10.7554/elife.43582), 2019-08-22
Supplement: supp [file elife-43582-supp-v1.zip › elife_poa_e43582_Supplementary_file_3.xlsx]

## Sheet: a
Expression values of qRT-PCR shown in Figure 1G.
The expression value present here is 2-∆CT ± standard error from three biological replicates.
PSR genes	Symbol	0 mM Pi										1 mM Pi											10 mM Pi
		Col-0		vih1-2 vih2-4		vih1-2		vih2-4		ipk1-1		Col-0		vih1-2 vih2-4		vih1-2		vih2-4		ipk1-1		Col-0		vih1-2 vih2-4		vih1-2		vih2-4		ipk1-1
		Average	Standard Error	Average	Standard Error	Average	Standard Error	Average	Standard Error	Average	Standard Error	Average	Standard Error	Average	Standard Error	Average	Standard Error	Average	Standard Error	Average	Standard Error	Average	Standard Error	Average	Standard Error	Average	Standard Error	Average	Standard Error	Average	Standard Error
AT1G73010	PPsPase1	10.3757	0.362588	0.824381	0.0642016	4.74745	1.16812	4.32204	0.448869	6.62449	0.896917	0.000589007	0.000170248	0.37498	0.0805822	0.00405189	0.000987717	0.00426169	0.000539534	0.00239144	0.000208695	0.00237529	0.000703446	0.56176	0.138169	0.00196694	0.000659467	0.0016715	0.000680081	0.00652379	0.00331671
AT1G17710	PECP1	19.6219	1.34379	8.87333	0.576384	6.97515	0.849364	7.59644	0.866569	16.1632	2.30027	0.00589795	0.00279897	0.418213	0.0828717	0.00741285	0.00105918	0.00911693	0.000956946	0.00565727	0.000363448	0.0049305	0.000977357	0.429162	0.0725254	0.00391	0.000853779	0.00219228	0.000584803	0.006397	0.00298257
AT2G11810	MGD3	2.04406	0.290387	0.0759772	0.0139352	0.549914	0.00978775	0.582276	0.0182869	1.34931	0.187247	0.000143507	7.12461e-05	0.019935	0.00539061	0.000549702	6.24646e-05	0.000449382	7.929e-05	0.000412026	2.78086e-05	0.00059265	0.000117613	0.010448	0.00220057	0.000309284	5.83451e-05	0.000218661	3.37817e-05	0.00228948	0.000814092
At5g20410	MGD2	1.43769	0.142167	0.23654	0.021062	0.606175	0.0151691	0.598138	0.0295609	1.04694	0.0761527	0.0140117	0.00210726	0.0349223	0.0131936	0.0110789	0.00262724	0.0053285	0.000827275	0.00350681	3.75641e-05	0.00971378	0.00315501	0.031131	0.0119028	0.00767565	0.00229174	0.00554834	0.00133216	0.0130284	0.00497679
AT5G20150	SPX1	4.44406	1.88951	4.99325	1.21104	2.78044	0.431263	2.85603	0.914723	4.55667	1.97524	0.125119	0.0677536	0.716886	0.189813	0.0903331	0.0746867	0.264382	0.223736	0.136797	0.114133	0.0208718	0.00901196	0.82141	0.4052	0.0179936	0.00450765	0.0167871	0.00521826	0.0355214	0.00828932
AT2G45130	SPX3	4.92994	0.867405	0.113293	0.00623691	1.26262	0.117068	1.5614	0.0717224	3.16239	0.512977	0.000799077	0.000218881	0.0941322	0.00596663	0.000564675	0.000122128	0.000839642	4.73594e-05	0.000402356	6.33807e-05	0.000471856	0.000121266	0.104474	0.0103464	0.000449929	0.000108113	0.000244384	6.87671e-05	0.00070637	0.000310272
At3g52820	PAP22	0.830569	0.200753	0.00587736	0.000398108	0.252549	0.0139133	0.297728	0.0377053	0.297639	0.0480284	0.000398623	9.64051e-05	0.0601903	0.012138	0.0053268	0.000652567	0.00323562	0.000236737	0.00459959	0.00039848	0.00557585	0.00117622	0.0882773	0.0189977	0.00296272	0.00091706	0.00274555	0.000829338	0.0130672	0.00589768
At1g52940	PAP5	0.298451	0.162223	0.0451724	0.00556692	0.169709	0.04498	0.143628	0.0689767	0.378695	0.141926	0.000243232	9.7684e-05	0.00200256	0.000245879	4.90698e-05	1.56015e-05	3.13813e-05	7.3923e-06	0.000152393	0.000125587	0.000229086	0.000100343	0.000474908	9.37029e-05	0.00015799	0.000128433	0.000493284	0.000353347	0.000111832	1.12046e-05
At3g52820	ACP5	7.57792	2.0286	0.839838	0.0249981	3.09296	0.187012	4.06788	0.325754	5.97311	0.551398	0.000106131	2.39381e-05	0.617372	0.274016	0.0504414	0.0137335	0.0729815	0.017694	0.0581712	0.00972268	0.0163464	0.00631796	0.878748	0.319815	0.0238141	0.00991067	0.0126914	0.00470152	0.00152478	0.00055921
At3g09922	IPS1	10.009	2.81727	13.025	0.620059	6.29595	0.101848	6.16543	1.72728	9.57865	1.97253	0.0121502	0.00497932	0.606908	0.173996	0.00890873	0.00199733	0.0322149	0.0038427	0.0136425	0.00621839	0.000509643	9.74392e-05	0.242741	0.0887494	0.000301661	5.84365e-05	0.000554239	0.000120798	0.00154745	0.000373508
At2g38940	PHT1;4	4.50201	2.72076	1.22139	1.20557	2.22162	0.847732	2.54185	0.804507	4.65451	2.77076	0.191861	0.178933	0.526168	0.295523	0.0611456	0.0214552	0.0788717	0.0228211	0.0523176	0.0251662	0.0403138	0.0190579	1.01132	0.327385	0.0413484	0.0135167	0.0327366	0.00969715	0.0787855	0.0453128
At4g28610	PHR1	0.220468	0.0599096	0.165483	0.101894	0.193692	0.0171888	0.152279	0.0183521	0.31776	0.0328337	0.0542621	0.052372	0.103801	0.057861	0.160418	0.0246482	0.144865	0.011101	0.126825	0.0242297	0.205281	0.0455194	0.217147	0.0413164	0.164212	0.0293783	0.16529	0.0232195	0.306213	0.0666032
At1g23010	LPR1	0.0168855	0.00675644	0.0196886	0.00832456	0.0280513	0.00583128	0.00988745	0.00285176	0.0254999	0.00632567	0.0106928	0.0032376	0.0071682	0.00340429	0.00933061	0.000716077	0.00832455	0.000365872	0.00692139	0.000829239	0.00954989	0.00406894	0.0179323	0.00680894	0.0074954	0.00152447	0.0090288	0.00133742	0.020174	0.00837885

## Sheet: b
Expression values of qRT-PCR shown in Figure 2D.
The expression value present here is 2-∆CT ± standard error from three biological replicates.
treatment	Genotype	PSR genes	AT1G73010	AT1G17710	AT2G11810	At5g20410	AT5G20150	AT2G45130	At3g52820	At1g52940	At3g09922	At2g38940	At4g28610	At1g23010
		Symbol	PPsPase1	PECP1	MGD3	MGD2	SPX1	SPX3	PAP22	PAP5	IPS1	PHT1;4	PHR1	LPR1
0 mM Pi	Col-0	Average	2.61682	5.38653	0.376231	0.424786	5.33573	0.888405	0.0617229	0.063131	7.3194	1.89455	0.233137	0.0112764
		Standard Error	0.362588	1.34379	0.290387	0.142167	1.88951	0.867405	0.200753	2.0286	2.81727	2.72076	0.0599096	0.00675644
	vih1-2 vih2-4	Average	0.824381	8.87333	0.0759772	0.23654	4.99325	0.113293	0.00587736	0.0451724	13.025	1.22139	0.165483	0.0196886
		Standard Error	0.0642016	0.576384	0.0139352	0.021062	1.21104	0.00623691	0.000398108	0.00556692	0.620059	1.20557	0.101894	0.00832456
	vih1-2 vih2-4 + pVIH2::VIH2-mCit, #1	Average	16.4786	5.71496	0.719224	1.21199	4.05753	2.80576	0.24198	0.363374	6.68196	3.6907	0.118249	0.00832818
		Standard Error	14.3121	1.20683	0.26183	0.928074	0.679526	0.884155	0.0652648	0.0098015	0.30158	0.688982	0.0152704	0.0018678
	vih1-2 vih2-4 + pVIH2::VIH2-mCit, #2	Average	9.69628	7.02219	0.941522	1.34237	8.17635	3.46545	0.307218	0.434937	12.4182	2.71856	0.344145	0.0127545
		Standard Error	6.98663	3.22455	0.229235	0.71	2.21299	0.53703	0.110222	0.074003	3.42286	0.535513	0.139608	0.00355822
	vih1-2 vih2-4 + pVIH2::VIH2-mCit, #3	Average	8.14207	3.98358	0.965183	1.7771	6.66094	3.17116	0.181843	0.314264	11.4957	2.5769	0.163452	0.012055
		Standard Error	3.76392	0.582103	0.186684	0.948039	0.932211	1.16793	0.00621229	0.0148814	0.987979	0.285951	0.0198427	0.000751349
	vih1-2 vih2-4 + pVIH1::VIH1-mCit, #1	Average	11.8099	10.5569	1.1602	1.90235	5.38796	3.26549	0.338823	0.38452	8.13205	4.69632	0.181479	0.00891073
		Standard Error	7.31203	2.293	0.323684	1.13392	0.327898	1.36096	0.0869418	0.00542015	0.460099	0.889094	0.0404604	0.00287107
	vih1-2 vih2-4 + pVIH1::VIH1-mCit, #2	Average	10.1868	11.1208	2.00323	1.9339	5.27218	3.23622	0.211	0.274431	8.65315	3.33572	0.1553	0.0103193
		Standard Error	5.23598	5.54361	0.922959	1.03452	0.434519	1.24562	0.0498275	0.0174085	0.764472	0.217155	0.01348	0.00122919
	vih1-2 vih2-4 + pVIH1::VIH1-mCit, #3	Average	3.52743	8.24085	1.08274	0.990568	4.2904	1.9059	0.235344	0.294289	6.66474	2.41425	0.143642	0.00572962
		Standard Error	0.348886	1.25377	0.146346	0.341116	0.297317	0.452805	0.0420091	0.0314874	0.728045	0.37356	0.00575566	0.000614548
	vih1-2 vih2-4 + pVIH2::VIH2KD/AA-mCit	Average	8.38615	14.7672	1.68964	4.0327	18.6459	5.28966	0.414611	0.867759	26.8248	1.30139	0.440163	0.0615947
		Standard Error	3.79918	3.41951	0.880197	2.98165	4.22137	0.698075	0.25352	0.122326	2.19397	0.28528	0.0144627	0.00590683
	vih1-2 vih2-4 + pVIH2::VIH2RH/AA-mCit, #1	Average	6.25541	14.3852	0.236581	0.566402	5.0176	1.3075	0.0592749	0.0233388	7.5027	0.675527	0.124021	0.020986
		Standard Error	0.0952332	0.00339743	2.99598	0.0345234	1.34398	0.403506	0.00620056	0.00373081	1.54424	2.02594	0.152246	0.0317702
	vih1-2 vih2-4 + pVIH2::VIH2RH/AA-mCit, #4	Average	5.15532	17.1887	0.294749	0.626883	6.7149	1.84285	0.0605504	0.0760739	8.87976	0.642932	0.135778	0.0298617
		Standard Error	0.0964221	0.0121751	3.58175	0.0236621	0.732085	0.232575	0.00532611	0.00692341	1.30844	1.39867	0.078736	0.0156693
	vih1-2 vih2-4 + pVIH2::VIH2RH/AA-mCit, #5	Average	5.65443	17.2722	0.344135	0.541106	4.23497	1.25835	0.11234	0.0470436	6.85689	1.27681	0.125167	0.0118432
		Standard Error	0.0805773	0.00715448	3.2911	0.0581933	0.900194	0.137974	0.0317738	0.0048175	0.92501	0.954812	0.189217	0.0161456
	vih2-6	Average	3.6465	6.18739	0.744533	1.83936	4.71223	1.3838	0.0671523	0.36363	9.48409	0.677786	0.159505	0.0186237
		Standard Error	1.1679	1.48969	0.328365	1.16235	0.625798	0.254474	0.0211589	0.0466103	0.382842	0.140705	0.0188152	0.00100344
	vih2-6 + pVIH2::VIH2-mCit, #1	Average	3.69848	6.67222	0.901944	3.04724	4.51832	1.59067	0.152537	0.252026	9.64239	0.561345	0.180092	0.0197138
		Standard Error	0.866528	1.60344	0.399073	2.25643	0.401287	0.207335	0.114413	0.0260078	0.99984	0.0973048	0.0216879	0.00241461
	vih2-6 + pVIH2::VIH2-mCit, #2	Average	2.90101	10.4287	0.771399	1.56041	6.46475	4.22182	0.0567993	0.434163	17.0951	0.587465	0.32349	0.0327557
		Standard Error	1.28516	5.20855	0.419524	0.809513	0.729225	2.81123	0.043174	0.182185	1.98907	0.250256	0.176121	0.0113541
	vih2-6 + pVIH2::VIH2-mCit, #3	Average	1.53164	3.34478	0.261451	0.467272	5.78281	0.841819	0.0141493	0.213276	12.6458	0.448799	0.22092	0.0287723
		Standard Error	0.121834	0.397973	0.0219801	0.0861929	1.60852	0.067957	0.00336524	0.0475368	7.45197	0.269741	0.0642701	0.00809648
1 mM Pi	Col-0	Average	0.000927952	0.00172824	0.000445407	0.00972433	0.042538	0.000322953	0.00220516	0.000141334	0.00251652	0.0113476	0.207583	0.0106928
		Standard Error	0.000170248	0.00279897	7.12461e-05	0.00210726	0.0677536	0.000218881	9.64051e-05	9.7684e-05	0.00497932	0.178933	0.052372	0.0032376
	vih1-2 vih2-4	Average	0.37498	0.418213	0.019935	0.0349223	0.716886	0.0941322	0.0601903	0.00200256	0.606908	0.526168	0.103801	0.0071682
		Standard Error	0.0805822	0.0828717	0.00539061	0.0131936	0.189813	0.00596663	0.012138	0.490363	0.173996	0.295523	0.057861	0.00340429
	vih1-2 vih2-4 + pVIH2::VIH2-mCit, #1	Average	0.0133757	0.00342327	0.00066994	0.00942246	0.0190011	0.00151581	0.00319947	0.000372845	0.00862225	0.0233899	0.10834	0.00312733
		Standard Error	0.0108088	0.0011268	0.000297939	0.0032015	0.00131484	0.000666445	0.00167497	0.000117692	0.00395772	0.00540153	0.00777275	0.000151304
	vih1-2 vih2-4 + pVIH2::VIH2-mCit, #2	Average	0.005041	0.00293927	0.00158365	0.0153068	0.0131768	0.00204058	0.00607873	0.00373469	0.00274175	0.0351588	0.104972	0.00247029
		Standard Error	0.00316014	0.000408685	0.000448008	0.00969034	0.000420241	0.000509817	0.00214946	0.00114105	0.000436519	0.0023277	0.0133871	0.00043238
	vih1-2 vih2-4 + pVIH2::VIH2-mCit, #3	Average	0.0188366	0.00605618	0.00272179	0.00951037	0.0737859	0.00385893	0.00848468	0.000763446	0.00283367	0.0264441	0.106648	0.00317405
		Standard Error	0.00754173	0.00243952	0.000837825	0.00606379	0.0315288	0.000382399	0.00174118	0.000488102	0.00068155	0.00508333	0.0122349	0.000153319
	vih1-2 vih2-4 + pVIH1::VIH1-mCit, #1	Average	0.00694262	0.00270077	0.00236641	0.00789383	0.0222669	0.00243289	0.00740956	0.00536583	0.0191298	0.0422093	0.127176	0.00369313
		Standard Error	0.00360639	0.000950602	0.000766236	0.00396092	0.00251706	0.000741885	0.000893624	0.000488837	0.00934933	0.0091907	0.0154684	0.000806078
	vih1-2 vih2-4 + pVIH1::VIH1-mCit, #2	Average	0.00677545	0.00766106	0.000779575	0.0109527	0.104931	0.000791673	0.00274619	0.00114208	0.00737928	0.033263	0.170403	0.00877461
		Standard Error	0.00117425	0.00351372	0.000119902	0.00743706	0.0223709	7.18815e-05	0.000317685	0.000392542	0.00208838	0.00802788	0.0210242	0.000828383
	vih1-2 vih2-4 + pVIH1::VIH1-mCit, #3	Average	0.0135831	0.0156836	0.0193488	0.022288	0.0846791	0.0195397	0.0213884	0.0263238	0.0239843	0.0227649	0.219013	0.0174258
		Standard Error	0.00304344	0.00148445	0.00853562	0.0183535	0.0104548	0.00450363	0.00563514	0.00559433	0.00354646	0.00600528	0.00876199	0.00127966
	vih1-2 vih2-4 + pVIH2::VIH2KD/AA-mCit	Average	0.489302	0.346037	0.0218185	0.036331	1.30694	0.109325	0.0843688	0.0134662	0.271498	0.381087	0.33736	0.061532
		Standard Error	0.15753	0.0778222	0.00876433	0.0213883	0.386726	0.0198573	0.0309079	0.00320264	0.0499065	0.0618663	0.00571	0.00729197
	vih1-2 vih2-4 + pVIH2::VIH2RH/AA-mCit, #1	Average	0.00231813	0.00317919	9.83509e-05	0.00607959	0.0103586	0.000218442	0.000896453	1.6017e-05	0.00111911	0.00406312	0.0879349	0.00354793
		Standard Error	0.000594016	1.90529e-06	0.000541244	1.13515e-05	0.000105948	2.81475e-05	0.000133858	0.000795149	0.00107457	0.000134117	0.000215358	0.0107954
	vih1-2 vih2-4 + pVIH2::VIH2RH/AA-mCit, #4	Average	0.00875326	0.00923875	0.00057848	0.0122839	0.0219596	0.000621182	0.00148424	0.000404623	0.00292711	0.0141402	0.112147	0.00767992
		Standard Error	0.0024091	4.57272e-05	0.00182319	4.73537e-05	0.000944313	0.000102393	7.17857e-05	0.0015045	0.00195524	0.000283978	0.00111461	0.0157048
	vih1-2 vih2-4 + pVIH2::VIH2RH/AA-mCit, #5	Average	0.00422876	0.00744593	0.000245931	0.00408272	0.0165675	0.000368171	0.00209437	6.15797e-05	0.00224905	0.0138051	0.122021	0.00341441
		Standard Error	0.000135919	5.0036e-06	0.000492775	7.49883e-06	0.000175722	9.08097e-06	0.000207537	0.000817362	0.00168694	0.000167545	0.00081719	0.032632
	vih2-6	Average	0.00469106	0.00276296	0.000428159	0.00915031	0.0300035	0.000506698	0.003567	0.000184293	0.00343801	0.0141845	0.105526	0.00456428
		Standard Error	0.000800086	0.000949371	5.98991e-06	0.00317413	0.00816816	0.000178201	0.000521255	5.68643e-05	0.00189182	0.000978602	0.018218	0.000508644
	vih2-6 + pVIH2::VIH2-mCit, #1	Average	0.00387396	0.00419673	0.00283322	0.0152363	0.0139861	0.00351215	0.00962015	0.00200256	0.00288382	0.013977	0.12954	0.00675318
		Standard Error	0.000517884	0.00050223	0.000712175	0.0087873	0.00215225	0.000664557	0.00388614	0.000362592	0.000222722	0.00240142	0.00721926	0.000275698
	vih2-6 + pVIH2::VIH2-mCit, #2	Average	0.00158541	0.00165757	0.00056463	0.00384003	0.01554	0.000669883	0.00116184	0.000678243	0.000913767	0.011426	0.105629	0.00381675
		Standard Error	8.26905e-05	8.00446e-05	6.34913e-05	0.000291119	0.000577783	7.70146e-05	4.31681e-05	0.000182633	0.000117132	0.000878611	0.00832127	0.00019292
	vih2-6 + pVIH2::VIH2-mCit, #3	Average	0.00285881	0.000482438	1.7085e-05	0.00171182	0.010138	2.51477e-05	0.000964091	0.000144558	0.000754237	0.00704253	0.0256871	0.00121075
		Standard Error	0.00165054	0.000278536	9.86404e-06	0.000988317	0.00585319	1.45191e-05	0.000556618	8.34604e-05	0.000435459	0.00406601	0.0148305	0.000699026
10 mM Pi	Col-0	Average	0.00122141	0.0013431	0.000616666	0.00727987	0.0250809	0.000443507	0.00182077	0.000510413	0.000791085	0.0119406	0.181592	0.00370183
		Standard Error	0.000703446	0.000977357	0.000117613	0.00315501	0.00901196	0.000121266	0.00117622	0.000100343	9.74392e-05	0.0190579	0.0455194	0.00406894
	vih1-2 vih2-4	Average	0.56176	0.429162	0.010448	0.031131	0.82141	0.104474	0.0882773	0.000474908	0.242741	1.01132	0.217147	0.0179323
		Standard Error	0.138169	0.0725254	0.00220057	0.0119028	0.4052	0.0103464	0.0189977	9.37029e-05	0.0887494	0.327385	0.0413164	0.00680894
	vih1-2 vih2-4 + pVIH2::VIH2-mCit, #1	Average	0.00545026	0.00312011	0.000611577	0.0119291	0.0164818	0.000651631	0.00172637	0.000264246	0.00465944	0.0252495	0.125113	0.00231846
		Standard Error	0.004736	0.000393275	0.000213006	0.00795574	0.00557013	0.000170359	0.00053052	5.02761e-05	0.00249338	0.00428253	0.00312717	0.000406059
	vih1-2 vih2-4 + pVIH2::VIH2-mCit, #2	Average	0.00713392	0.00166298	0.00188171	0.00769395	0.0152782	0.0029833	0.00778101	0.00127003	0.00611312	0.0370571	0.0936163	0.00291494
		Standard Error	0.00518036	0.00045854	0.00140992	0.00437215	0.00178598	0.00273217	0.0026349	0.00111179	0.00577198	0.00481922	0.00526487	0.000799806
	vih1-2 vih2-4 + pVIH2::VIH2-mCit, #3	Average	0.00515946	0.00158857	0.00156803	0.00660624	0.024788	0.00204008	0.00424571	0.00171265	0.00169117	0.0340571	0.098201	0.00255473
		Standard Error	0.00110396	0.000270931	0.00105504	0.00480253	0.00510556	0.000809864	0.00212065	0.000688555	0.000578837	0.00536015	0.00651595	0.000544912
	vih1-2 vih2-4 + pVIH1::VIH1-mCit, #1	Average	0.0429122	0.0048647	0.00355761	0.00998273	0.0369819	0.00451918	0.00616833	0.00200433	0.00320764	0.0206807	0.0873025	0.0039186
		Standard Error	0.0417859	0.00366241	0.00198914	0.00719998	0.0259016	0.00345769	0.00479362	0.000233894	0.00114763	0.00291655	0.0235201	0.00180048
	vih1-2 vih2-4 + pVIH1::VIH1-mCit, #2	Average	0.0341756	0.00297697	0.00109927	0.0072018	0.0527334	0.00290513	0.00547904	0.000335961	0.00208559	0.0433999	0.145016	0.00485286
		Standard Error	0.0335024	0.00139367	0.000847369	0.00278371	0.00592662	0.00257466	0.00460228	7.47816e-05	0.000589177	0.0235251	0.0108065	0.00191496
	vih1-2 vih2-4 + pVIH1::VIH1-mCit, #3	Average	0.00097327	0.00118195	0.000694091	0.00891414	0.00889848	0.000452618	0.00315473	0.000634547	0.00100015	0.018256	0.0599572	0.00183507
		Standard Error	0.000451539	0.000239787	0.00031031	0.00632553	0.0014101	8.20358e-05	0.00151283	0.000145966	9.53684e-05	0.000969695	0.00873317	0.000124069
	vih1-2 vih2-4 + pVIH2::VIH2KD/AA-mCit	Average	0.551603	0.396736	0.0336444	0.048494	2.27141	0.119107	0.0792491	0.0186432	0.435211	0.376828	0.343969	0.0650907
		Standard Error	0.143514	0.0649432	0.00825831	0.0284548	0.503174	0.0252382	0.017924	0.00358526	0.120351	0.058743	0.0392068	0.00693367
	vih1-2 vih2-4 + pVIH2::VIH2RH/AA-mCit, #1	Average	0.0021919	0.00304987	0.000237168	0.0047995	0.00923826	0.000241217	0.00138629	0.000134685	0.000479429	0.00704122	0.0748975	0.00198059
		Standard Error	0.000267246	0.000104252	0.000108004	0.000114482	0.0004473	0.000120791	0.000608197	0.000548839	0.00227249	0.000176234	0.00366813	0.0126523
	vih1-2 vih2-4 + pVIH2::VIH2RH/AA-mCit, #4	Average	0.00318562	0.00332194	0.000455289	0.00515533	0.0105627	0.000414177	0.00186881	0.000283038	0.000709244	0.00824006	0.0865147	0.00204017
		Standard Error	0.000269264	0.000124018	0.000302237	0.000169097	0.000779696	0.000118706	0.000406254	0.00047236	0.00231793	0.000185002	0.00178096	0.011558
	vih1-2 vih2-4 + pVIH2::VIH2RH/AA-mCit, #5	Average	0.00260478	0.00516847	0.000355708	0.00647688	0.00891815	0.000220103	0.00173791	6.41539e-05	0.00043092	0.0120925	0.100337	0.00331689
		Standard Error	0.00100908	1.37232e-05	0.000699696	7.46672e-05	0.000680792	4.37843e-05	0.000202254	0.0012495	0.00158323	8.59287e-05	0.00344845	0.0273509
	vih2-6	Average	0.0038628	0.00173506	0.000544869	0.00719137	0.0301178	0.000492228	0.00783803	0.000248619	0.00112296	0.0208289	0.107737	0.00642416
		Standard Error	0.000236235	0.000249747	0.000116805	0.00358559	0.00457872	0.000164886	0.00256205	5.6269e-05	7.86793e-05	0.00925133	0.0235484	0.000306192
	vih2-6 + pVIH2::VIH2-mCit, #1	Average	0.00787097	0.00954831	0.00889644	0.0110767	0.0197976	0.00678061	0.0162742	0.0138988	0.00883371	0.0277013	0.120626	0.00986771
		Standard Error	0.00168463	0.000583609	0.00311513	0.00631943	0.00402242	0.000260947	0.00605135	0.00265842	0.00107576	0.00363285	0.015209	0.000806692
	vih2-6 + pVIH2::VIH2-mCit, #2	Average	0.00180503	0.00209868	0.00047971	0.00457944	0.0142431	0.00036588	0.00231849	0.000441238	0.00204096	0.0158948	0.112736	0.00384873
		Standard Error	0.000130792	8.81652e-05	4.27851e-05	0.000400042	0.00209452	3.66152e-05	0.000214088	3.36641e-05	0.000259422	0.00398431	0.0132162	0.000164524
	vih2-6 + pVIH2::VIH2-mCit, #3	Average	0.00421171	0.00196094	0.000420133	0.00685443	0.0386002	0.000371742	0.00140475	0.00013827	0.00183351	0.0228076	0.179369	0.01004
		Standard Error	0.00360531	0.00108576	0.000196368	0.00228366	0.013052	0.000138795	0.000302971	3.72273e-05	0.000918323	0.0045868	0.0273669	0.00142481

## Sheet: c
Expression values of qRT-PCR shown in Figure 3D.
The expression value present here is 2-∆CT ± standard error from three biological replicates.
PSR genes	Symbol	0 mM Pi								1 mM Pi								10 mM Pi
		Col-0		vih1-2 vih2-4		phr1 phl1		vih1-2 vih2-4 phr1 phl1		Col-0		vih1-2 vih2-4		phr1 phl1		vih1-2 vih2-4 phr1 phl1		Col-0		vih1-2 vih2-4		phr1 phl1		vih1-2 vih2-4 phr1 phl1
		Average	Standard Error	Average	Standard Error	Average	Standard Error	Average	Standard Error	Average	Standard Error	Average	Standard Error	Average	Standard Error	Average	Standard Error	Average	Standard Error	Average	Standard Error	Average	Standard Error	Average	Standard Error
AT1G73010	PPsPase1	10.3757	0.362588	0.824381	0.0642016	0.251267	0.00215354	0.168655	0.00107289	0.000589007	0.000170248	0.37498	0.0805822	0.00122001	0.000239072	0.00304295	0.000217756	0.00237529	0.000703446	0.56176	0.138169	0.00146705	0.000151722	0.00106987	2.18586e-05
AT1G17710	PECP1	19.6219	1.34379	8.87333	0.576384	0.0509082	0.000331818	0.0429735	0.000650564	0.00589795	0.00279897	0.418213	0.0828717	0.00220076	0.00110708	0.00460626	0.00072637	0.0049305	0.000977357	0.429162	0.0725254	0.00179161	0.00102802	0.002384	0.000341395
AT2G11810	MGD3	2.04406	0.290387	0.0759772	0.0139352	0.0131995	0.00715581	0.0155454	0.00674756	0.000143507	7.12461e-05	0.019935	0.00539061	0.00118362	0.00116916	0.00270291	0.000821375	0.00059265	0.000117613	0.010448	0.00220057	0.00050547	0.000821186	0.000584463	0.000472703
At5g20410	MGD2	1.43769	0.142167	0.23654	0.021062	0.0894557	0.00195695	0.098008	0.0023932	0.0140117	0.00210726	0.0349223	0.0131936	0.0126731	0.000473132	0.0106798	0.000109396	0.00971378	0.00315501	0.031131	0.0119028	0.0116161	0.000355549	0.00863058	0.000153159
AT5G20150	SPX1	4.44406	1.88951	4.99325	1.21104	0.675418	0.0195364	0.608864	0.0151211	0.125119	0.0677536	0.716886	0.189813	0.0265801	0.00603889	0.0320181	0.00225738	0.0208718	0.00901196	0.82141	0.4052	0.0220836	0.0052552	0.0300871	0.00206421
AT2G45130	SPX3	4.92994	0.867405	0.113293	0.00623691	0.0224112	0.0780764	0.0161634	0.02685	0.000799077	0.000218881	0.0941322	0.00596663	0.000585372	0.000536378	0.00236102	0.000366311	0.000471856	0.000121266	0.104474	0.0103464	0.000330153	0.000684143	0.000251673	0.000213663
At3g52820	PAP22	0.830569	0.200753	0.00587736	0.000398108	0.00317562	0.0368645	0.0092517	0.0693955	0.000398623	9.64051e-05	0.0601903	0.012138	0.0023138	0.00386865	0.0051223	0.00731898	0.00557585	0.00117622	0.0882773	0.0189977	0.0023162	0.00221262	0.0027316	0.00157217
At1g52940	PAP5	0.298451	2.0286	0.0451724	0.00556692	0.00094148	0.00468435	0.000149504	0.00176362	0.000243232	9.7684e-05	0.492225	0.490363	0.000646266	0.00152631	0.00288586	0.000618873	0.000229086	0.000100343	0.000474908	9.37029e-05	3.91902e-05	0.00231492	0.000228864	0.000113454
At3g09922	IPS1	10.009	2.81727	13.025	0.620059	0.0752525	0.200181	0.017523	0.019609	0.0121502	0.00497932	0.606908	0.173996	0.00717726	0.00829139	0.00274022	0.00412989	0.000509643	9.74392e-05	0.242741	0.0887494	0.0268882	0.0047531	0.00110388	0.0140083
At2g38940	PHT1;4	4.50201	2.72076	1.22139	1.20557	0.328703	0.00352916	0.0596964	0.00722201	0.191861	0.178933	0.526168	0.295523	0.0180944	0.0052239	0.0130561	0.0140069	0.0403138	0.0190579	1.01132	0.327385	0.0117007	0.0137593	0.031362	0.027096
At4g28610	PHR1	0.220468	0.0599096	0.165483	0.101894	0.0571159	0.00224647	0.053447	0.00120288	0.0542621	0.052372	0.103801	0.057861	0.0822748	0.000185753	0.0692696	0.000848235	0.205281	0.0455194	0.217147	0.0413164	0.109627	0.000482481	0.117549	0.000945613
At1g23010	LPR1	0.0168855	0.00675644	0.0196886	0.00832456	0.0179945	0.000135342	0.00690832	4.06619e-05	0.0106928	0.0032376	0.0071682	0.00340429	0.00381146	6.16778e-05	0.00389618	0.000187894	0.00954989	0.00406894	0.0179323	0.00680894	0.00533914	7.13395e-06	0.00604427	1.33774e-05

## Sheet: d
Expression values of qRT-PCR shown in Figure 2 – figure supplement 3D.
The expression value present here is 2-∆CT ± standard error from three biological replicates.
treatment	Genotype	PSR genes	AT1G73010	AT1G17710	AT2G11810	At5g20410	AT5G20150	AT2G45130	At3g52820	At1g52940	At3g09922	At2g38940	At4g28610	At1g23010
		Symbol	PPsPase1	PECP1	MGD3	MGD2	SPX1	SPX3	PAP22	PAP5	IPS1	PHT1;4	PHR1	LPR1
0 mM Pi	Col-0	Average	10.3757	19.6219	2.04406	1.43769	4.44406	4.92994	0.830569	0.298451	10.009	4.50201	0.220468	0.0168855
		Standard Error	0.362588	1.34379	0.290387	0.142167	1.88951	0.867405	0.200753	2.0286	2.81727	2.72076	0.0599096	0.00675644
	Ubi10::VIH2-mCit, #1	Average	8.26861	10.2758	0.530235	0.71368	3.73307	1.19723	0.136443	0.0571622	7.99055	0.998266	0.106102	0.0155247
		Standard Error	0.144575	0.0117436	3.52738	0.0508198	0.192508	3.89031	0.809516	1.98898	0.209182	0.00515322	0.00100308	0.00356469
	Ubi10::VIH2-mCit, #2	Average	4.89011	9.20419	0.322604	0.333871	3.21273	0.884349	0.0460697	0.0880627	6.78781	1.27913	0.131123	0.0121728
		Standard Error	0.204245	0.0210632	4.20723	0.0487204	0.0404564	1.67415	0.956838	2.86175	0.268474	0.031391	0.00373953	0.0220003
	Ubi10::VIH2-mCit, #3	Average	8.73114	12.8799	0.433281	1.07378	3.36541	1.34796	0.142264	0.0537691	6.8009	0.899446	0.173777	0.027672
		Standard Error	0.481965	0.0434587	6.71049	0.0378277	0.593897	4.96347	0.525767	1.84305	0.259381	0.0639286	0.011172	0.00584778
	Ubi10::VIH2KD/AA-mCit, #1	Average	2.01909	5.33755	0.244076	0.319304	2.42526	0.722428	0.086544	0.0165355	3.48433	0.966746	0.127281	0.00638393
		Standard Error	0.106622	0.0276675	0.91039	0.0531765	0.112057	0.380489	1.14005	1.93032	0.32546	0.0200235	0.000872402	0.00396704
	Ubi10::VIH2KD/AA-mCit, #2	Average	1.49455	4.73914	0.210883	0.241498	2.93081	0.725598	0.11101	0.0272942	3.57194	1.60583	0.136067	0.00776698
		Standard Error	0.0542844	0.0179318	1.79652	0.0133645	0.00716105	0.376219	1.18846	1.5667	0.964421	0.0221496	0.00210584	0.0136101
	Ubi10::VIH2KD/AA-mCit, #3	Average	2.53086	5.37757	0.188155	0.189982	3.849	1.17959	0.0676653	0.0623912	5.00093	2.59585	0.28376	0.0132304
		Standard Error	0.16227	0.0163101	3.49921	0.0583653	0.0601172	1.87764	1.03869	2.98975	0.554679	0.0576345	0.00309039	0.0115083
	Ubi10::VIH2RH/AA-mCit, #1	Average	8.41977	10.2922	0.363522	0.989989	9.37765	2.34169	0.110507	0.210126	44.4503	0.274012	0.151168	0.132501
		Standard Error	0.357847	0.0121701	3.62215	0.0372797	0.25116	3.85006	1.39898	7.94138	0.0392363	0.00748112	0.0148887	0.0120265
	Ubi10::VIH2RH/AA-mCit, #4	Average	0.262648	2.54443	0.125435	0.13379	2.15526	0.512246	0.0235015	0.104146	9.21117	0.520755	0.0713806	0.0130556
		Standard Error	0.103545	0.00979187	0.60982	0.0749881	0.093735	0.152707	0.367279	1.12321	0.0739654	0.0113492	0.00688251	0.0227766
	Ubi10::VIH2RH/AA-mCit, #5	Average	1.31459	3.41128	0.276698	0.343994	1.38761	0.607041	0.0675243	0.135691	3.8159	0.962101	0.0977686	0.012681
		Standard Error	0.0887516	0.00860593	0.498737	0.0341192	0.0297128	0.319344	0.128525	0.335515	0.067564	0.00752225	0.00182122	0.0196708
1 mM Pi	Col-0	Average	0.000589007	0.00589795	0.000143507	0.0140117	0.125119	0.000799077	0.000398623	0.000243232	0.0121502	0.191861	0.0542621	0.0106928
		Standard Error	0.000170248	0.00279897	7.12461e-05	0.00210726	0.0677536	0.000218881	9.64051e-05	9.7684e-05	0.00497932	0.178933	0.052372	0.0032376
	Ubi10::VIH2-mCit, #1	Average	0.000933664	0.00117189	0.000123459	0.00442231	0.0139882	0.000166849	0.000770562	5.39943e-05	0.000651458	0.0144141	0.0906323	0.00377509
		Standard Error	3.22332e-05	0.000138359	0.000173387	2.3844e-05	0.00123046	0.000421505	0.000345303	8.42443e-05	0.000926186	0.00888159	0.000243384	7.16925e-06
	Ubi10::VIH2-mCit, #2	Average	0.00169764	0.00270482	0.000204619	0.00433715	0.0207835	0.000236618	0.000994618	0.000294764	0.00196099	0.0452277	0.163979	0.00447597
		Standard Error	0.000102414	0.000421923	0.00200371	8.53902e-05	0.00184412	0.00111211	0.00753823	0.000985395	0.015495	0.0307281	0.00112563	0.000143825
	Ubi10::VIH2-mCit, #3	Average	0.00186944	0.00426056	0.000351114	0.00398602	0.0252889	0.000365661	0.00147764	5.49622e-05	0.00454642	0.015994	0.0873207	0.00341677
		Standard Error	8.25443e-05	0.000407888	0.000850511	8.09195e-05	0.000846101	0.00107694	0.000813319	0.000240896	0.00105908	0.00386947	0.000381959	8.49053e-06
	Ubi10::VIH2KD/AA-mCit, #1	Average	0.00178536	0.00502791	0.00047712	0.0102035	0.0369054	0.000348678	0.00281939	0.000228862	0.00379098	0.0528217	0.174947	0.00533894
		Standard Error	8.64389e-05	0.000785902	0.00195945	8.32841e-05	0.00279718	0.000516723	0.0205925	0.00279959	0.0303791	0.0400527	0.00102506	0.000102022
	Ubi10::VIH2KD/AA-mCit, #2	Average	0.0081032	0.0147103	0.00533212	0.00692057	0.0376144	0.00635671	0.00715285	0.00643995	0.00825383	0.0421281	0.208003	0.0078149
		Standard Error	0.0011984	0.00063892	0.00740776	0.000981162	0.000268409	0.00457555	0.00816826	0.00294253	0.012605	0.0542703	0.00166944	0.0034734
	Ubi10::VIH2KD/AA-mCit, #3	Average	0.0054844	0.00717382	0.000619527	0.00426438	0.0512726	0.000997935	0.00488924	0.0100035	0.0171274	0.0700808	0.207756	0.00828101
		Standard Error	0.000244928	0.00102328	0.00260391	0.000131475	0.000882143	0.00237219	0.0236904	0.0149743	0.031764	0.0746256	0.00570248	0.00985914
	Ubi10::VIH2RH/AA-mCit, #1	Average	0.00549161	0.0135006	0.00248213	0.0214222	0.0786599	0.00124402	0.00130235	0.000115084	0.015871	0.0194499	0.0908966	0.00452003
		Standard Error	0.000139294	0.000340701	0.00344243	0.000275278	0.00678343	0.00183515	0.00162259	0.001072	0.00103721	0.00305869	0.000108034	1.25941e-05
	Ubi10::VIH2RH/AA-mCit, #4	Average	0.0101614	0.034188	0.00429913	0.0309872	0.0774868	0.00152091	0.00211625	9.41792e-05	0.0616382	0.0261242	0.0864114	0.00398364
		Standard Error	0.000307077	0.000425459	0.00482568	0.00077707	0.00873601	0.00307076	0.00301308	0.00144409	0.000349597	0.00158986	0.000242985	1.21702e-05
	Ubi10::VIH2RH/AA-mCit, #5	Average	0.0129674	0.0399721	0.00601114	0.0354595	0.0940522	0.0027641	0.00173138	0.000241391	0.0304679	0.0186793	0.0714089	0.00434809
		Standard Error	0.00054788	0.000386551	0.00804474	0.00147363	0.00735502	0.00574891	0.0127191	0.00357092	0.00146653	0.0190047	0.000589457	3.63696e-05
10 mM Pi	Col-0	Average	0.00237529	0.0049305	0.00059265	0.00971378	0.0208718	0.000471856	0.00557585	0.000229086	0.000509643	0.0403138	0.205281	0.00954989
		Standard Error	0.000703446	0.000977357	0.000117613	0.00315501	0.00901196	0.000121266	0.00117622	0.000100343	9.74392e-05	0.0190579	0.0455194	0.00406894
	Ubi10::VIH2-mCit, #1	Average	0.000266637	0.0021044	0.000192177	0.00364282	0.00667777	8.32761e-05	0.000904857	3.04663e-05	0.000142192	0.0103375	0.113385	0.00158627
		Standard Error	2.85349e-05	0.000121988	0.000279265	2.0199e-05	0.000658721	8.93474e-05	0.000415009	4.12431e-06	0.000518674	0.0078677	0.000303325	5.61276e-06
	Ubi10::VIH2-mCit, #2	Average	0.00148578	0.00252633	0.000478141	0.00312734	0.022318	0.000322879	0.00123653	0.000866786	0.00144147	0.0314157	0.167166	0.00523529
		Standard Error	5.19272e-05	0.000420522	0.00136851	0.000102285	0.000431434	0.000786638	0.00803908	0.000889987	0.00724059	0.0290083	0.00104609	0.000323236
	Ubi10::VIH2-mCit, #3	Average	0.00116907	0.0036566	0.00351636	0.00455456	0.0181954	0.00108814	0.00111756	0.00140598	0.00268256	0.00576027	0.143057	0.00521143
		Standard Error	0.000418505	0.000286327	0.00113658	0.00083652	0.00149767	0.000499324	0.00091732	0.000917296	0.000552379	0.0451177	0.000564602	0.000407436
	Ubi10::VIH2KD/AA-mCit, #1	Average	0.00198487	0.00408988	0.000249925	0.00575748	0.0177505	0.000398005	0.00260669	8.28044e-05	0.000908519	0.0399718	0.134551	0.00461286
		Standard Error	0.000133297	0.00045663	0.00235088	8.12739e-05	0.00149256	0.00123699	0.00478027	0.000426251	0.0155827	0.0159935	0.00156541	2.2959e-05
	Ubi10::VIH2KD/AA-mCit, #2	Average	0.0037626	0.00868342	0.00139099	0.00543197	0.0322029	0.0019438	0.00452322	0.00123263	0.0031859	0.0360033	0.180169	0.00490107
		Standard Error	0.00081316	0.000432381	0.00626275	0.000509178	0.00288221	0.00275054	0.00602112	0.00139696	0.00790037	0.0297231	0.00098412	0.000420764
	Ubi10::VIH2KD/AA-mCit, #3	Average	0.00493763	0.0141894	0.00052227	0.00822618	0.0368285	0.00088042	0.00281534	0.000805564	0.00307337	0.0321555	0.185599	0.00396768
		Standard Error	0.000188985	0.00079532	0.00510021	1.04915e-05	0.000740286	0.00184779	0.00955582	0.000304943	0.000266988	0.0196544	0.000664851	0.000751864
	Ubi10::VIH2RH/AA-mCit, #1	Average	0.000403055	0.00107589	0.000184116	0.00378973	0.00651791	0.000130378	0.0010523	3.25058e-05	0.000174872	0.00924911	0.0752628	0.00240551
		Standard Error	3.26658e-05	0.000313418	0.000200039	4.90288e-05	0.00102019	0.000159541	0.00147644	1.938e-05	0.00107137	0.00792514	9.84465e-05	7.91515e-06
	Ubi10::VIH2RH/AA-mCit, #4	Average	0.000995852	0.00122623	0.000417985	0.00822696	0.00974913	0.000221959	0.00173033	0.00014133	0.000387848	0.0151181	0.10098	0.0026493
		Standard Error	3.11572e-05	0.000256038	0.000121689	4.28492e-05	0.00113593	0.000340888	0.000337888	1.84701e-05	0.00225441	0.00798341	6.36426e-05	3.86267e-06
	Ubi10::VIH2RH/AA-mCit, #5	Average	0.00135512	0.00392866	0.000962128	0.00810187	0.0399142	0.00145478	0.00204302	0.00162324	0.00220026	0.00554369	0.139262	0.00876867
		Standard Error	0.000326654	0.000463909	0.00119301	0.00012156	0.00117633	0.000359	0.00257804	6.4799e-05	0.000498039	0.0186425	0.00107653	0.000343756

## Sheet: e
Expression values of qRT-PCR shown in Figure 6E
The expression value present here is 2-∆CT ± standard error from three biological replicates.
PSR genes	symbol	8 h of re-feeding						24 h of re-feeding						48 h of re-feeding
		0 mM Pi		0.5 mM Pi		0.5 mM Phi		0 mM Pi		0.5 mM Pi		0.5 mM Phi		0 mM Pi		0.5 mM Pi		0.5 mM Phi
		Average	Standard Error	Average	Standard Error	Average	Standard Error	Average	Standard Error	Average	Standard Error	Average	Standard Error	Average	Standard Error	Average	Standard Error	Average	Standard Error
AT1G73010	PPsPase1	9.13517	0.524973	0.887393	0.111142	5.73651	0.39734	12.2781	1.12768	0.352608	0.0357573	3.07349	0.386357	20.1083	3.54992	0.0834744	0.0144829	3.43911	0.485539
AT1G17710	PECP1	13.1448	2.56338	1.33675	0.190585	9.85528	0.760167	24.455	3.05535	0.616567	0.0217687	7.2942	0.229405	22.5821	1.7048	0.0609951	0.00675634	3.86093	0.672828
AT2G11810	MGD3	0.712778	0.0820539	0.0808742	0.0144755	0.471158	0.040771	0.758597	0.020582	0.0213059	0.00297889	0.370703	0.0257731	0.504026	0.0133326	0.00118148	0.000178241	0.196445	0.00610326
At5g20410	MGD2	0.983808	0.0908899	0.0941918	0.00854113	0.911157	0.173217	1.05807	0.180051	0.0803317	0.0155683	0.698064	0.145629	1.2997	0.267971	0.0211557	0.00304306	0.490775	0.0886311
AT5G20150	SPX1	8.27523	0.0793783	1.16473	0.072905	9.57195	2.04788	13.5498	1.66693	2.45126	1.56888	5.31702	2.20098	9.83206	0.782213	0.0591709	0.00228013	3.32753	0.517532
AT2G45130	SPX3	2.56642	0.331612	0.188223	0.0131506	1.3065	0.156381	3.83144	0.159496	0.0819786	0.00604044	1.15394	0.0502031	3.05723	0.25141	0.00451302	0.0011888	0.55229	0.0937645
At3g52820	PAP22	0.0556739	0.00515242	0.0143947	0.00072732	0.0180056	0.000457679	0.0650287	0.0107621	0.00384507	0.000856493	0.0175878	0.00258352	0.0479737	0.00864241	0.00336569	0.000313065	0.0102236	0.00182703
At1g52940	PAP5	0.0396587	0.00255327	0.0026359	0.000213114	0.0298228	0.00357932	0.0662485	0.00282195	0.00783689	0.00539168	0.0221288	0.0102635	0.0691043	0.00646078	4.34269e-05	1.49757e-05	0.00620529	0.00098748
At3g52820	ACP5	11.3549	0.899733	2.09328	0.399824	6.93596	0.584333	15.4068	2.1345	0.7583	0.0784706	5.14751	0.187528	9.88545	1.25241	0.318196	0.0316977	3.85269	0.320169
At3g09922	IPS1	13.5069	2.67654	3.83942	0.568454	21.8374	2.41293	19.2446	2.21917	4.03356	1.90787	8.04669	3.41077	35.6639	6.12809	0.29375	0.0223486	9.14756	3.19129
At2g38940	PHT1;4	1.56717	0.129493	0.498175	0.0378126	0.829005	0.155455	2.35507	0.298363	0.347756	0.139521	0.559864	0.184392	1.21	0.120312	0.119829	0.00166518	0.478877	0.100292
At4g28610	PHR1	0.212173	0.0140197	0.180599	0.01958	0.184598	0.0251582	0.196546	0.0194481	0.185872	0.0543003	0.142863	0.0323038	0.192223	0.00595493	0.158799	0.018643	0.115411	0.0220576
At1g23010	LPR1	0.135927	0.0645191	0.216978	0.152033	0.272145	0.185333	0.18794	0.135511	0.417606	0.342403	0.188359	0.112808	0.220688	0.17611	0.0325999	0.0207014	0.0825319	0.0524101
