# Supplementary figures and images for: Two bifunctional inositol pyrophosphate kinases/phosphatases control plant phosphate homeostasis
Source: eLife journal article supplement (doi:10.7554/elife.43582), 2019-08-22

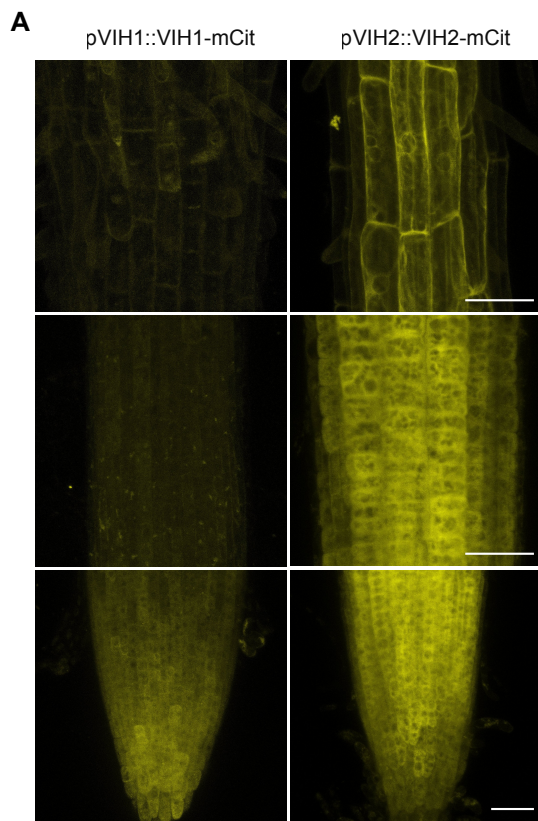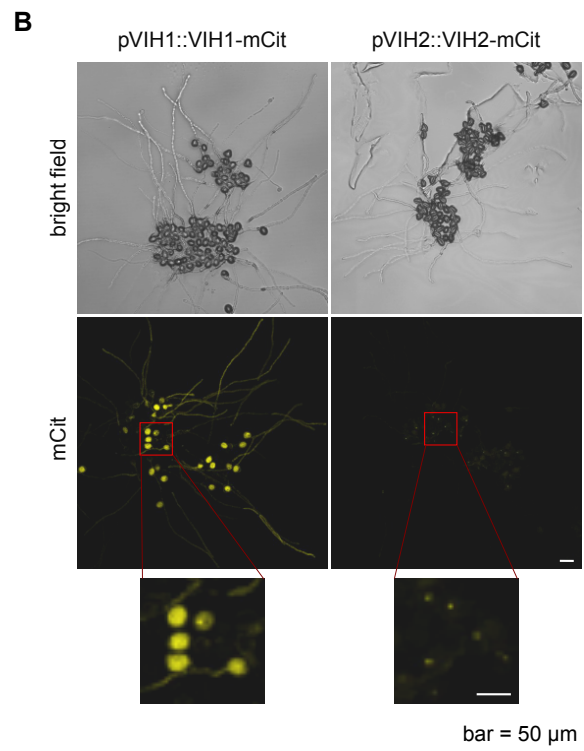

Supplement: supp [file elife-43582-supp-v1.zip › elife_poa_e43582_Figure_1_figure_supplement_4.pdf]

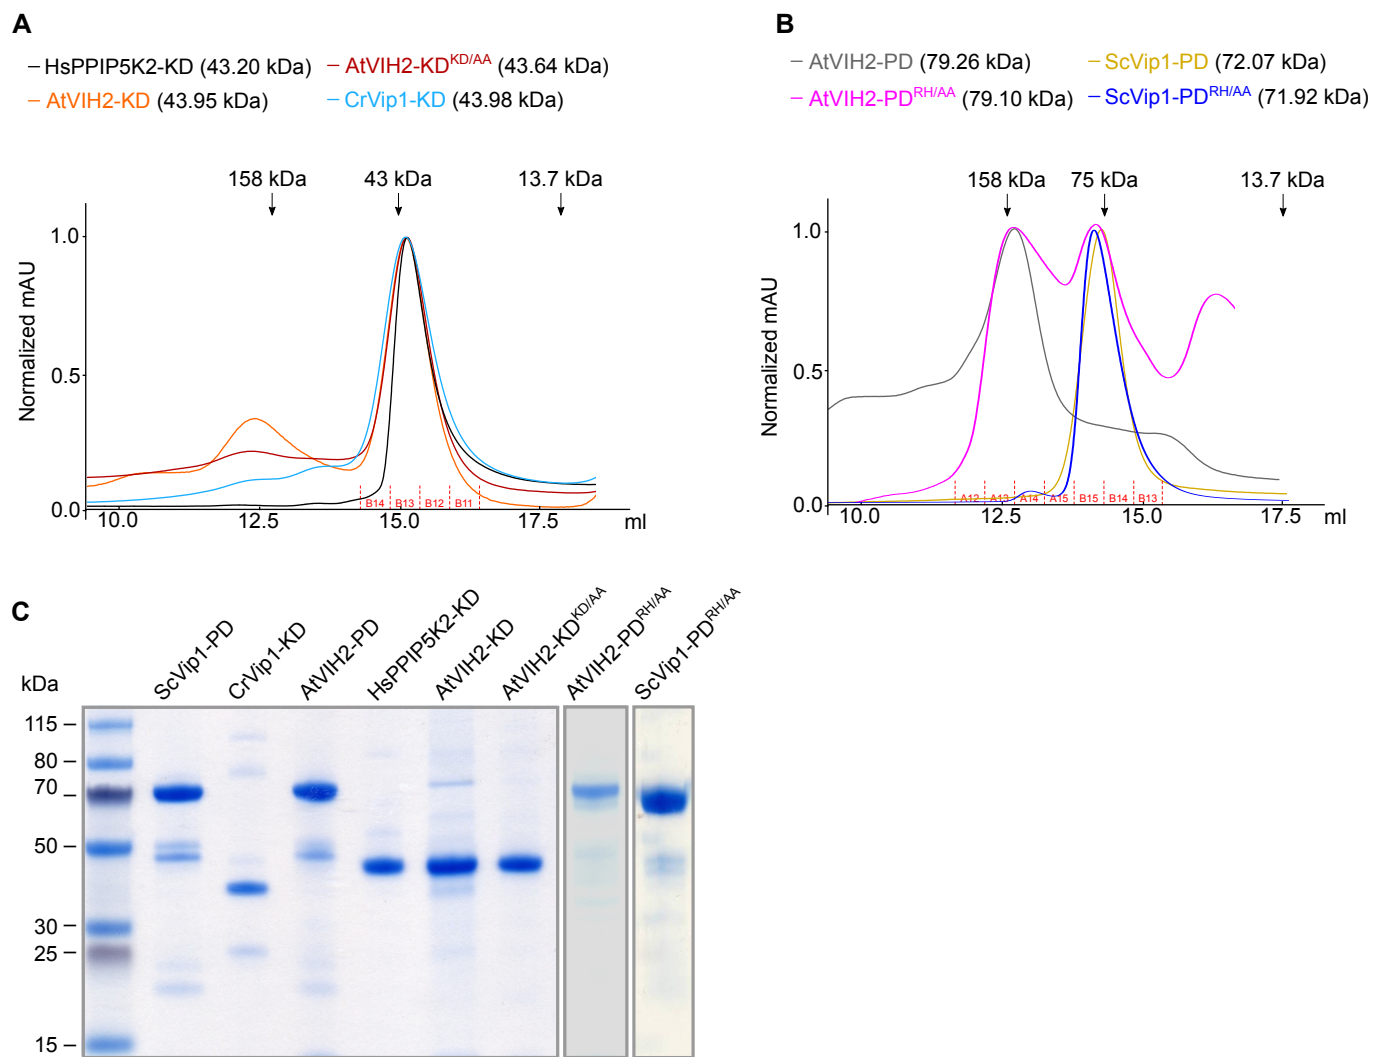

Supplement: supp [file elife-43582-supp-v1.zip › elife_poa_e43582_Figure_5_figure_supplement_1.pdf]

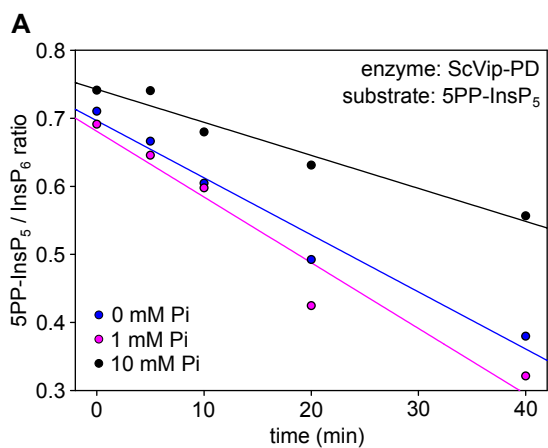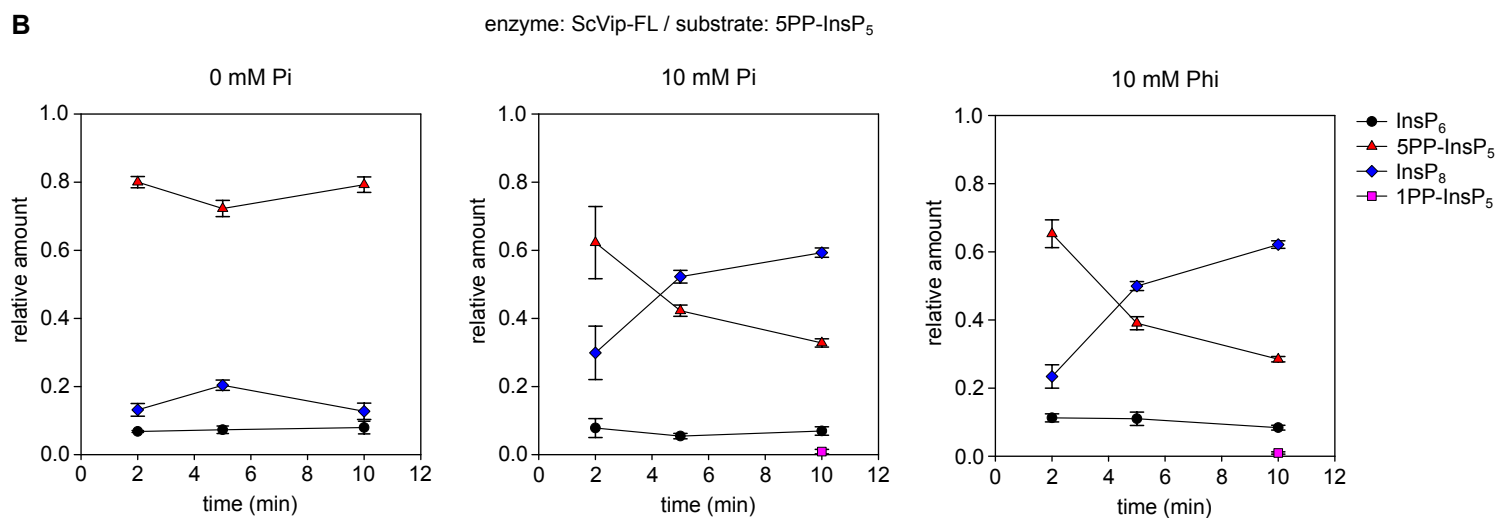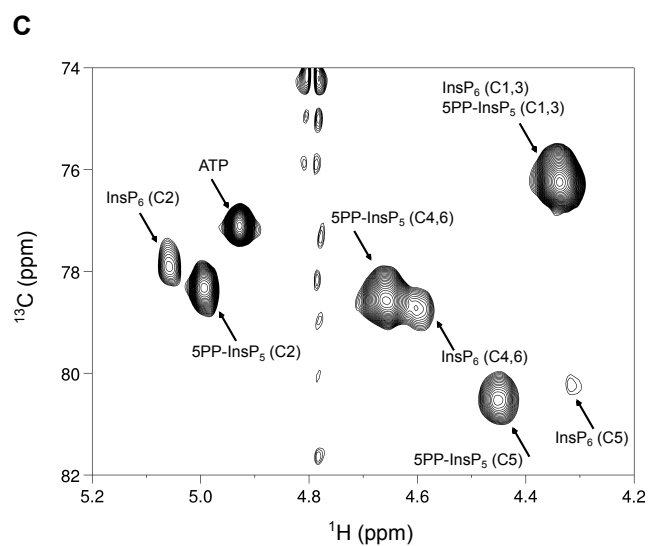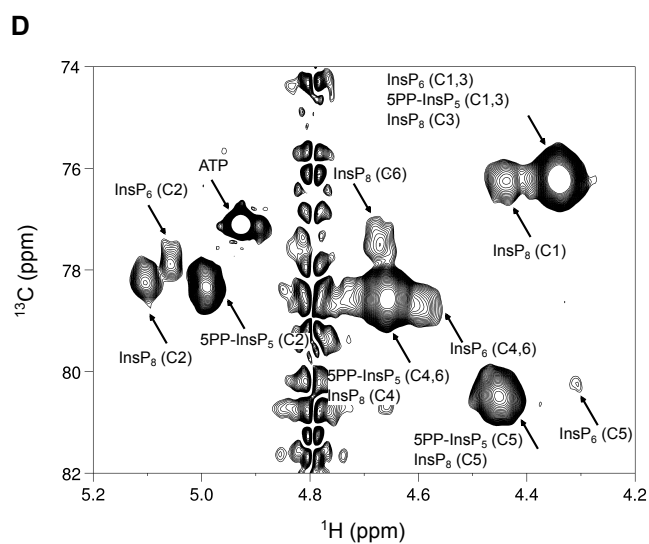

Supplement: supp [file elife-43582-supp-v1.zip › elife_poa_e43582_Figure_6_figure_supplement_2.pdf]

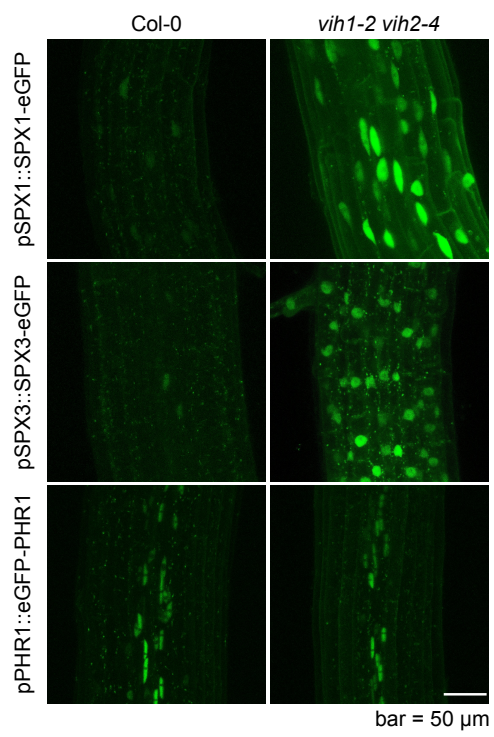

Supplement: supp [file elife-43582-supp-v1.zip › elife_poa_e43582_Figure_4_figure_supplement_2.pdf]

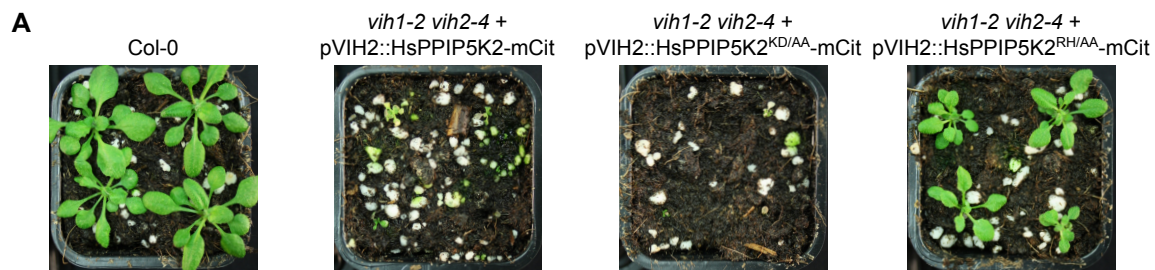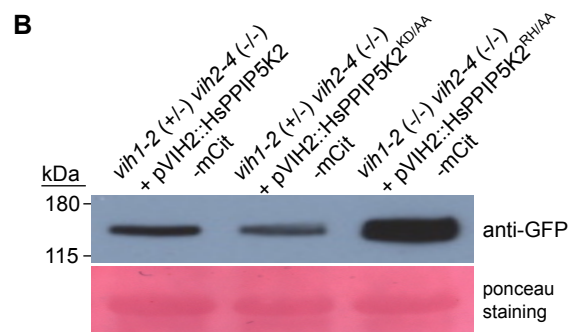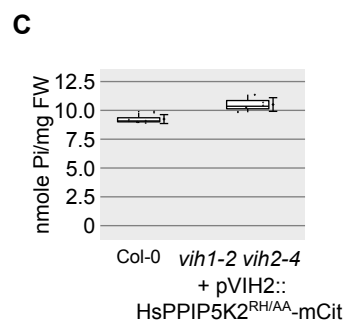

Supplement: supp [file elife-43582-supp-v1.zip › elife_poa_e43582_Figure_4_figure_supplement_3.pdf]

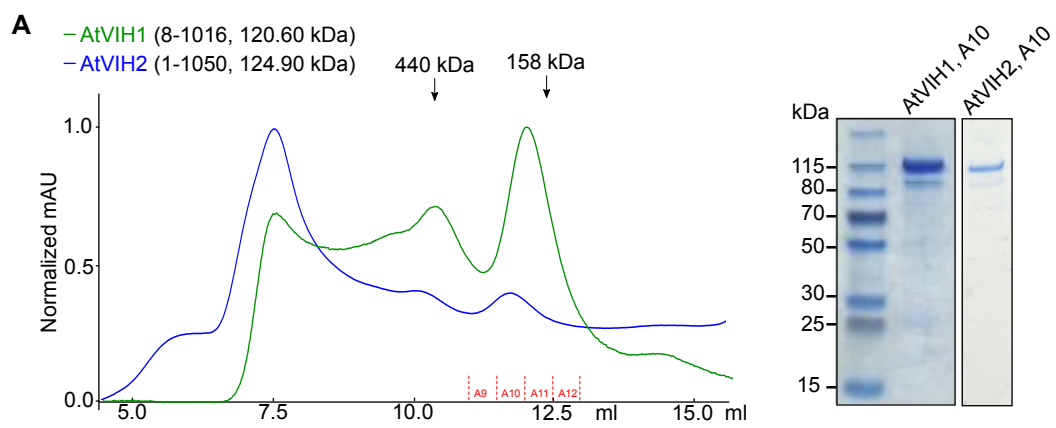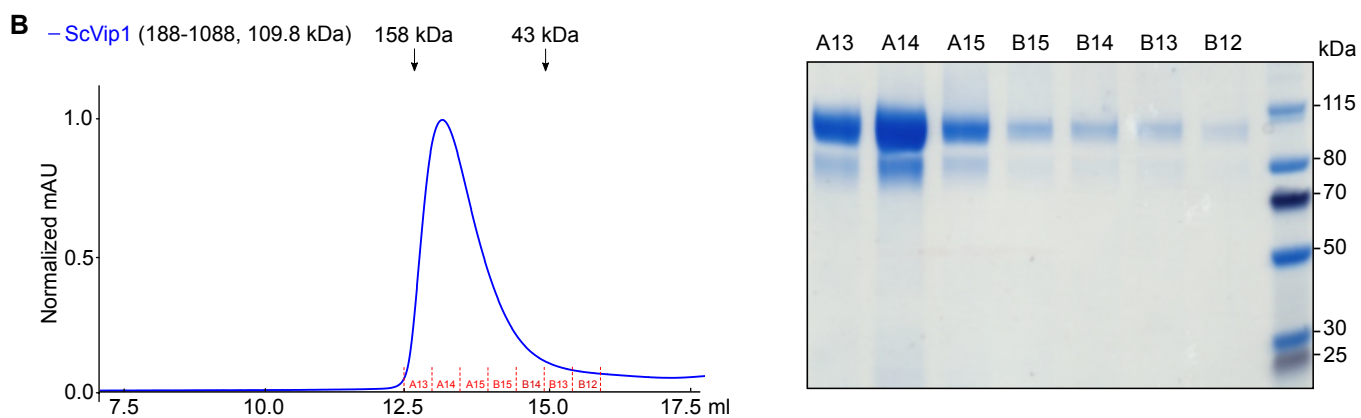

Supplement: supp [file elife-43582-supp-v1.zip › elife_poa_e43582_Figure_6_figure_supplement_1.pdf]

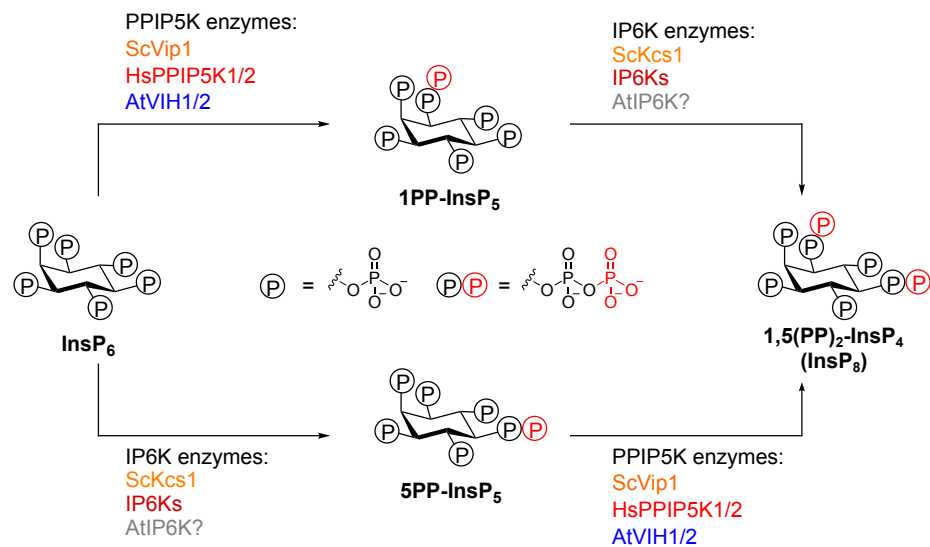

Supplement: supp [file elife-43582-supp-v1.zip › elife_poa_e43582_Figure_1_figure_supplement_1.pdf]

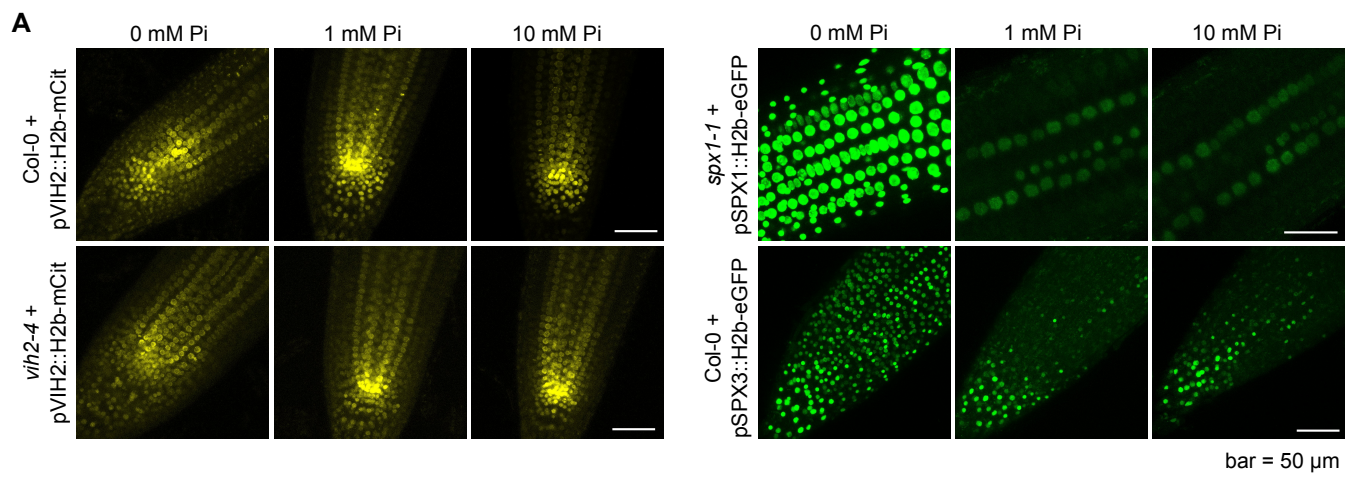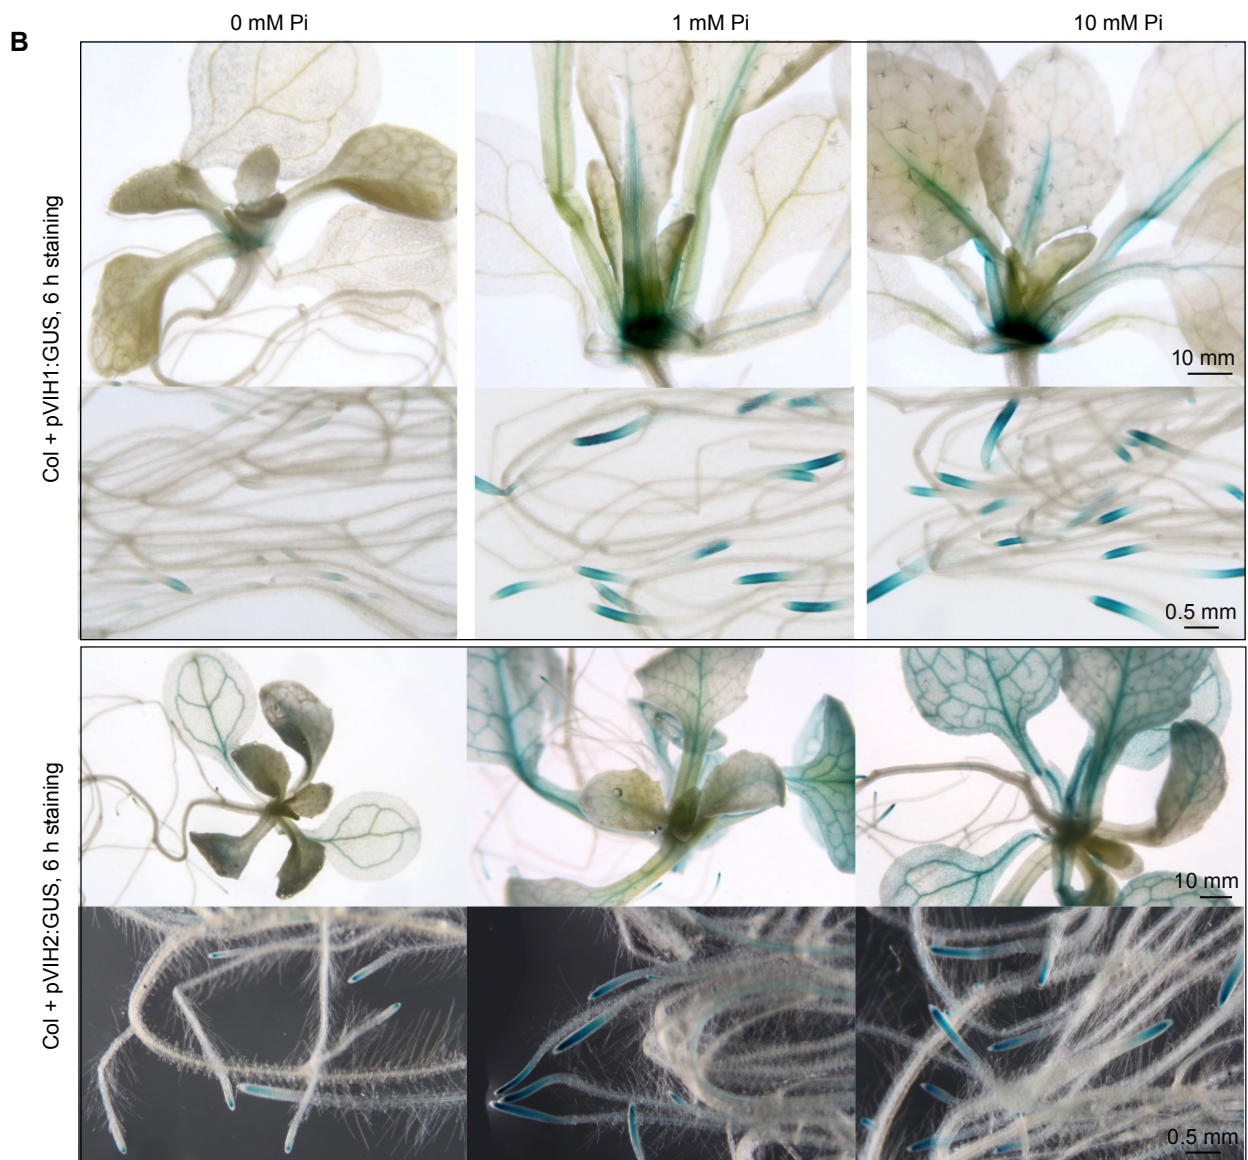

Supplement: supp [file elife-43582-supp-v1.zip › elife_poa_e43582_Figure_4_figure_supplement_1.pdf]

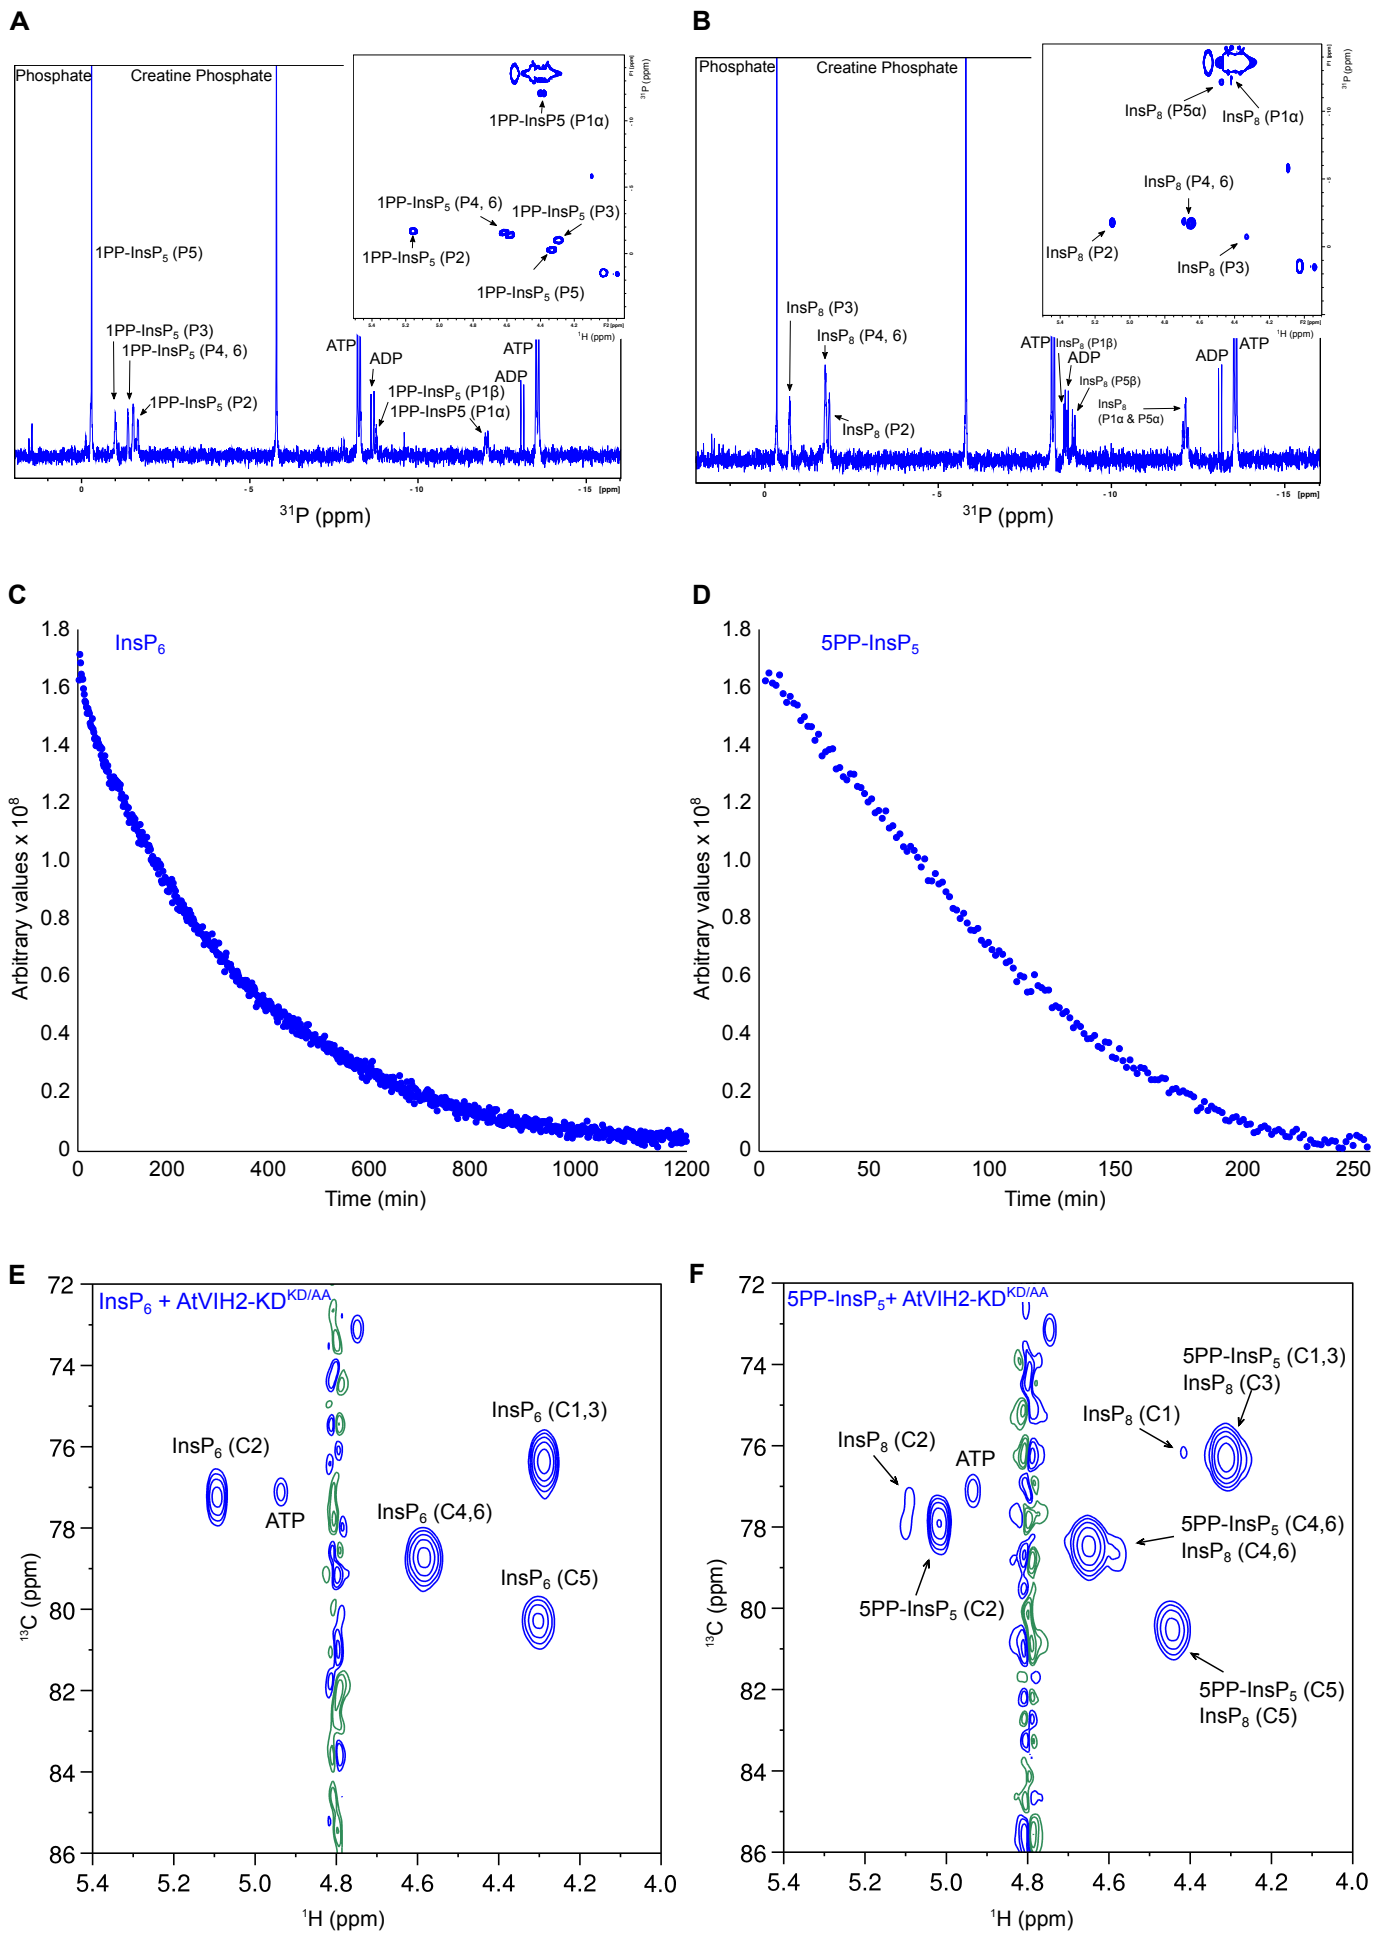

Supplement: supp [file elife-43582-supp-v1.zip › elife_poa_e43582_Figure_5_figure_supplement_2.pdf]

**A**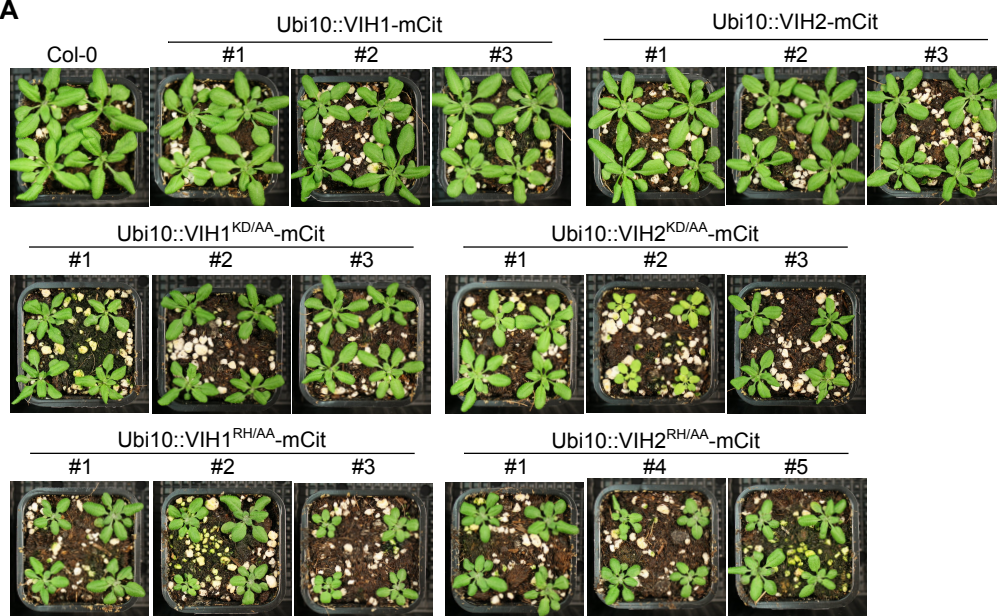**B**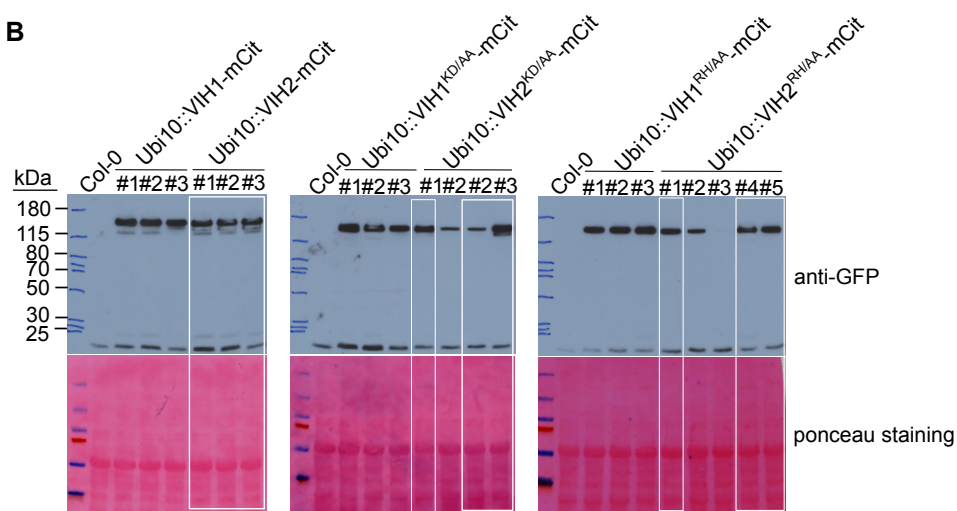**C**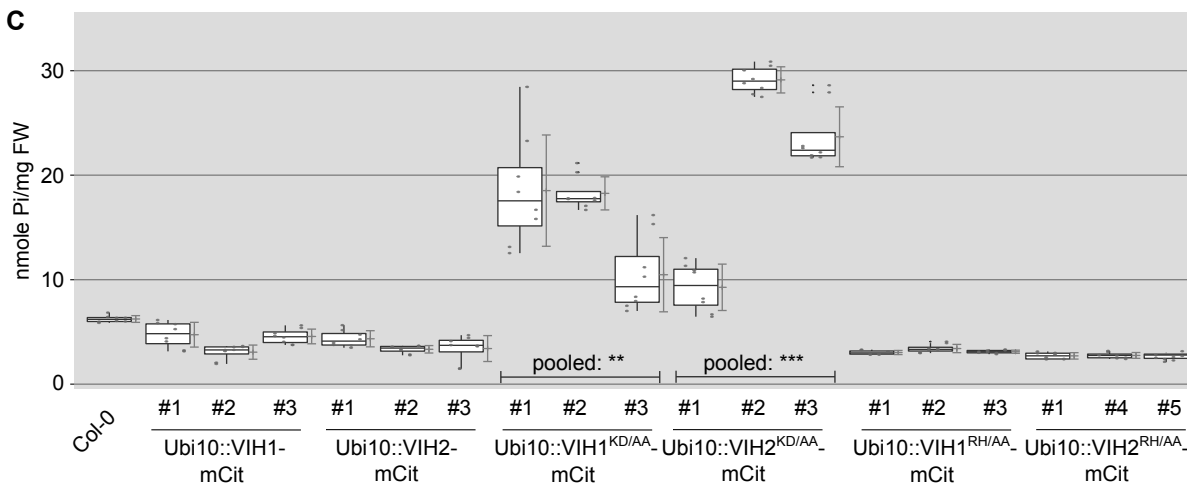

Supplement: supp [file elife-43582-supp-v1.zip › elife_poa_e43582_Figure_2_figure_supplement_4.pdf]

pVIH1::GUS, 4 h staining

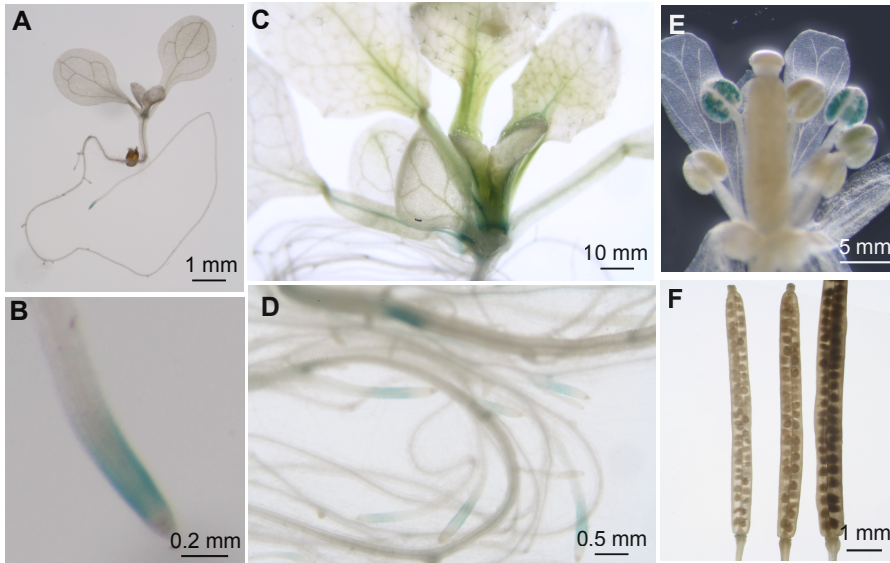

pVIH2::GUS, 4 h staining

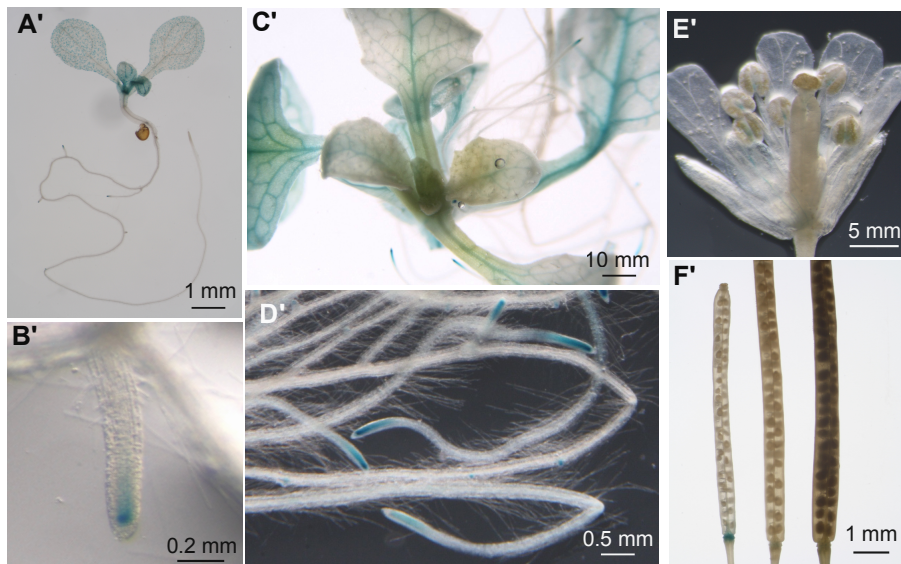

Supplement: supp [file elife-43582-supp-v1.zip › elife_poa_e43582_Figure_1_figure_supplement_3.pdf]

**A**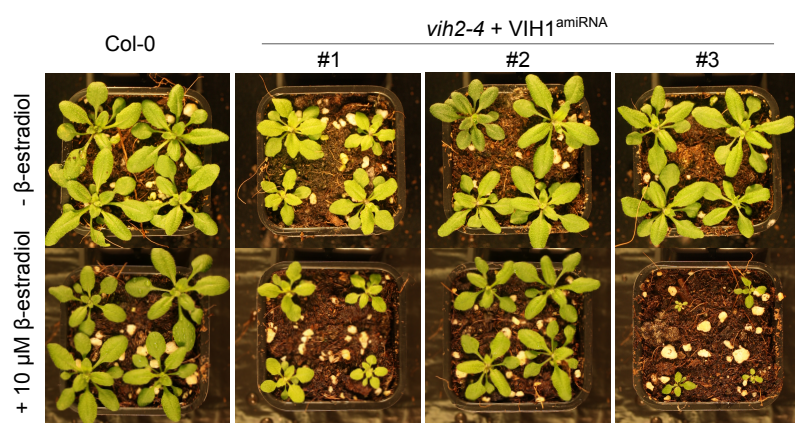**B**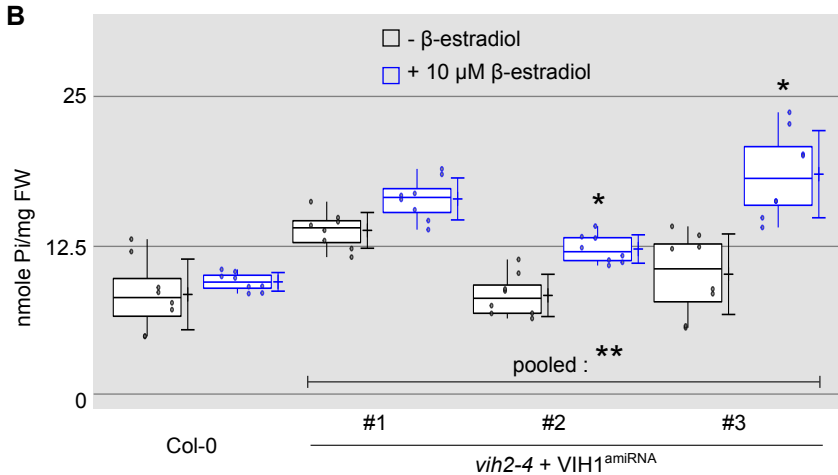

Supplement: supp [file elife-43582-supp-v1.zip › elife_poa_e43582_Figure_1_figure_supplement_5.pdf]

substrate: 5PP-InsP<sub>5</sub>, overnight incubation

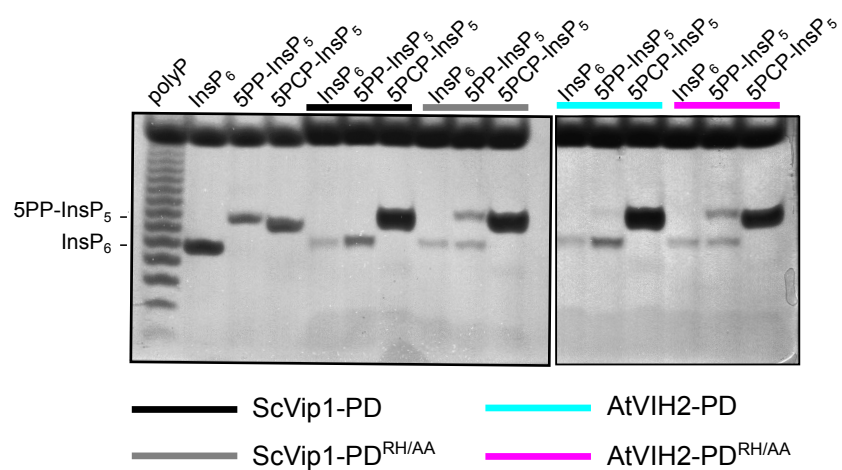

Supplement: supp [file elife-43582-supp-v1.zip › elife_poa_e43582_Figure_5_figure_supplement_3.pdf]

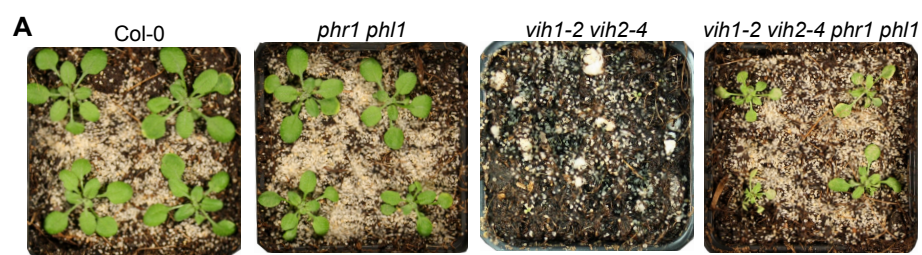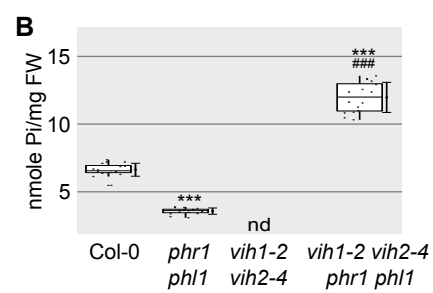

Supplement: supp [file elife-43582-supp-v1.zip › elife_poa_e43582_Figure_3_figure_supplement_1.pdf]

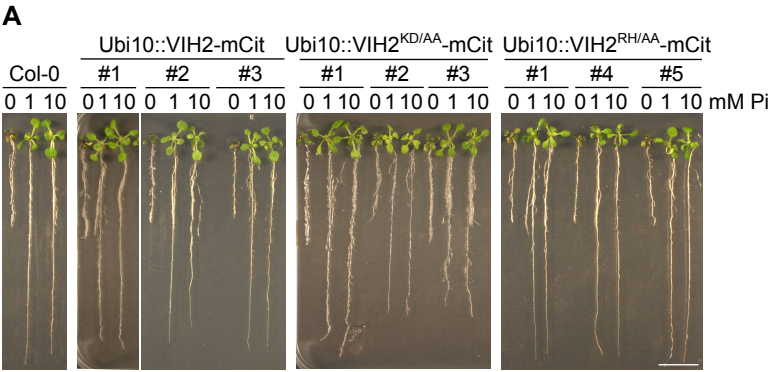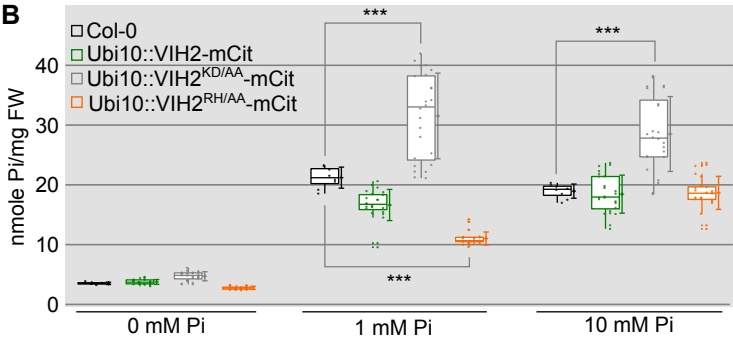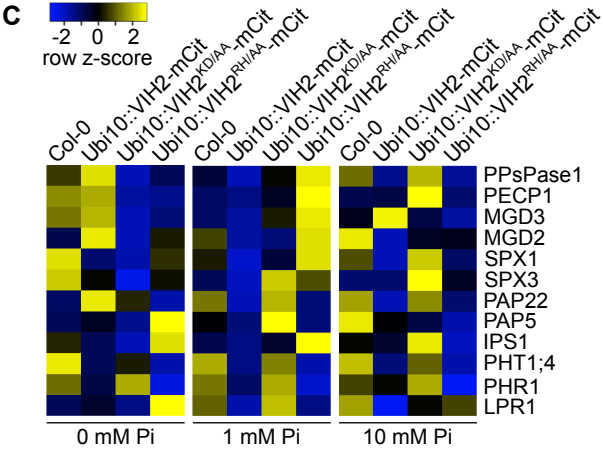

Supplement: supp [file elife-43582-supp-v1.zip › elife_poa_e43582_Figure_2_figure_supplement_3.pdf]

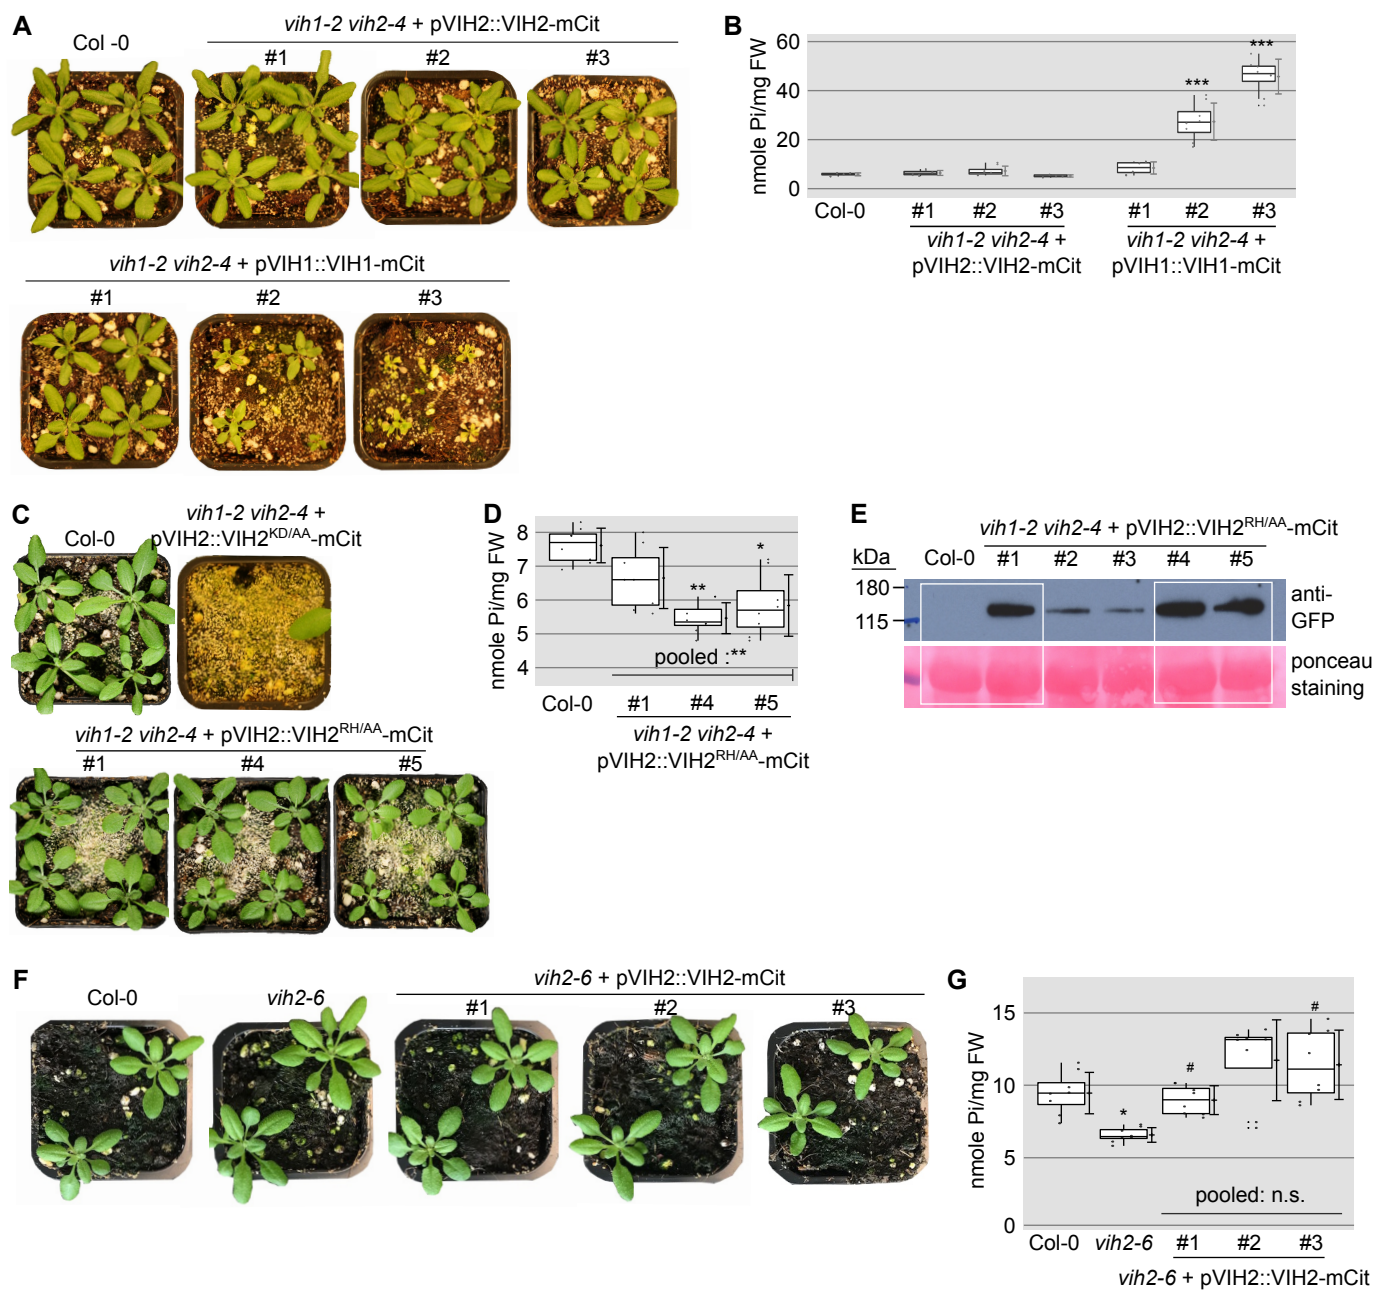

Supplement: supp [file elife-43582-supp-v1.zip › elife_poa_e43582_Figure_2_figure_supplement_2.pdf]

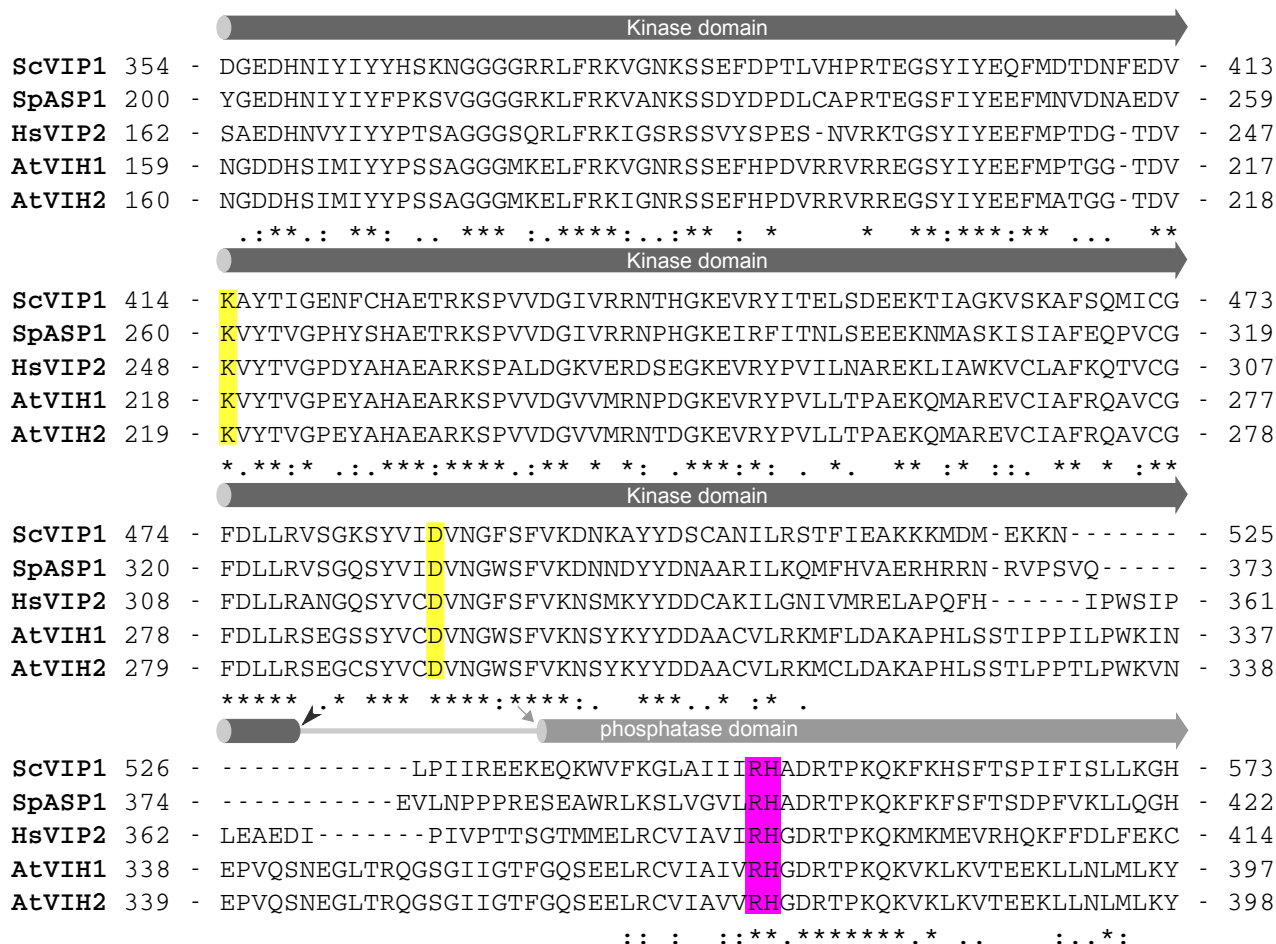

Supplement: supp [file elife_poa_e43582_Figure_1_figure_supplement_2.pdf › elife_poa_e43582_Figure_1_figure_supplement_2.pdf]
